# Supplementary material for: The stereochemical outcome of allyl magnesium and indium additions to 5-substituted norbornen-7-ones and its application to cis fused carbocycle formation via ring rearrangement metathesis
Source: Royal Society of Chemistry journal article supplement (doi:10.1039/c2ob26784e), 2012-01-01
Supplement: c2ob26784e.pdf [file c2ob26784e.pdf]

**The stereochemical outcome of allyl magnesium and indium additions to 5-substituted norbornen-7-ones and its application to *cis* fused carbocycle formation *via* ring rearrangement metathesis**

Patricia E. Standen,<sup>a</sup> Dharati Dodia,<sup>a</sup> Mark R. J. Elsegood,<sup>a</sup> Simon J. Teat<sup>b</sup> and Marc C. Kimber<sup>\*a</sup>

<sup>a</sup>The Department of Chemistry, Loughborough University, Loughborough, Leicestershire, LE11 3TU, UK.

<sup>b</sup>ALS, Berkeley Laboratory, 1 Cyclotron Road, CA 94720, USA

\*Corresponding author. Tel.: +44 (0)150-922-2570, Fax: +44 (0)150-922-3925, E-mail: M.C.Kimber@lboro.ac.uk

|                                                               |                |
|---------------------------------------------------------------|----------------|
| <b>Synthetic procedures for 18, 19, 20.</b>                   | <b>S1-S2</b>   |
| <b>Copies of <sup>1</sup>H and <sup>13</sup>C NMR spectra</b> | <b>S3-S19</b>  |
| <b>Crystallographic tables for 25</b>                         | <b>S20-S23</b> |

**7,7-Dimethoxy-2-endo-carboethoxy-1,4,5,6-tetrachlorobicyclohept-5-ene 18.**<sup>1</sup> 5,5-dimethoxy-1,2,3,4-tetrachlorocyclopentadiene **10** (4.54 g, 3.00 mL, 0.017 mol) was added to dry 3-necked round bottomed flask fitted with a condenser. Methyl acrylate (2.94 g, 3.00 mL, 0.034 mol) was added and the reaction heated to 75°C for 48 hours under nitrogen. The crude product was then distilled at 200°C at 2 mbar to give the titled compound as a clear oil (4.94 g, 85%);  $\nu_{\max}$  3155, 2953, 2254, 1737  $\text{cm}^{-1}$ ; <sup>1</sup>H NMR (400 MHz, CDCl<sub>3</sub>)  $\delta$  3.70 (s, 3H) 3.60 (s, 3H) 3.54 (s, 3H) 3.42 (dd,  $J = 4.2, 9.2$  Hz, 1H) 2.49 (dd,  $J = 9.2, 11.8$  Hz, 1H), 2.25 (dd,  $J = 4.2, 11.8$  Hz, 1H); <sup>13</sup>C NMR (100 MHz, CDCl<sub>3</sub>)  $\delta$  170.3, 130.6, 128.0, 111.9, 76.9, 74.1, 52.8, 52.5, 21.8, 50.4, 38.9; IR (CH<sub>2</sub>Cl<sub>2</sub>) MS-ESI found 372.9345 C<sub>11</sub>H<sub>12</sub>Cl<sub>4</sub>O<sub>4</sub>, [M+Na]<sup>+</sup> requires 372.9352.

**7,7-Dimethoxy-1,4,5,6-tetrachlorobicyclohept-5-ene-2-endo-carboxylic acid 19.**<sup>1</sup> KOH (1.23 g, 23 mmol) was dissolved in EtOH/H<sub>2</sub>O (50 mL, 1:1) and added to a dry round bottomed flask. 7,7-Dimethoxy-2-endo-carboethoxy-1,4,5,6-tetrachlorobicyclohept-5-ene (1.50 g, 44 mmol) was then added, once dissolved the reaction was heated to reflux for 45 min under nitrogen. The volume was then partially reduced under vacuum. A saturated oxalic acid solution was then added and the aqueous layer extracted with ethyl acetate and the organic layers then dried over magnesium sulphate. The excess volatiles were removed under reduced pressure furnishing the title compound as a colourless solid (1.37 g, 95%); m.p. 161-163 °C; IR (CH<sub>2</sub>Cl<sub>2</sub>)  $\nu_{\max}$  3500, 2900, 1713, 1423  $\text{cm}^{-1}$ ; <sup>1</sup>H NMR (400 MHz, CDCl<sub>3</sub>)  $\delta$  3.62 (s, 3H) 3.57 (s, 3H), 3.48 (dd,  $J = 4.4, 9.6$  Hz, 1H) 2.54 (dd,  $J = 9.6, 11.0$  Hz, 1H), 2.25 (dd,  $J = 4.4, 11.6$  Hz, 1H); <sup>13</sup>C NMR (100 MHz, CDCl<sub>3</sub>)  $\delta$  175.6, 130.7, 127.9, 112.0, 77.2, 74.0, 52.9, 51.9, 50.4, 38.9; MS-ESI found 358.9193 C<sub>10</sub>H<sub>14</sub>Cl<sub>4</sub>O<sub>4</sub>, [M+Na]<sup>+</sup> requires 358.9196.

**7,7-Dimethoxyhept-5-ene-2-endo-carboxylic acid 20.** A 3-necked round bottomed flask was fitted with a dropping funnel, nitrogen inlet and cold trap. Sodium (4.00 g, 170 mmol) was chopped into 1mm by 1mm cubes and added to the flask and dissolved in aqueous liquid ammonia (75-100 mL). 7,7-Dimethoxy-1,4,5,6-tetrachlorobicyclohept-5-ene-2-endo-carboxylic acid (3.00 g, 8.70 mmol) was then dissolved in EtOH/Et<sub>2</sub>O (50 mL 1:1) and added drop wise for 30 min. The reaction was then quenched using NH<sub>4</sub>Cl and then left to warm to room temperature while the ammonia evaporated off. The resulting liquid was then added to ice water and acidified using 2M HCL. Aqueous work up was then afforded and organic layers dried over magnesium sulphate. Excess volatiles were removed under reduced pressure. This furnished the title compound as colourless solid (1.48 g, 82%); m.p. 75-78 °C; IR (CH<sub>2</sub>Cl<sub>2</sub>)  $\nu_{\max}$  3050, 2955, 2253, 1705 cm<sup>-1</sup>; <sup>1</sup>H NMR (400 MHz, CDCl<sub>3</sub>)  $\delta$  6.25 (dd, *J* = 3.4, 6.2 Hz, 1H), 6.05 (dd, *J* = 2.3, 6.0 Hz, 1H), 3.22 (s, 3H), 3.12 (s, 3H), 2.88 (t, *J* = 3.7 Hz, 1H), 2.14 – 2.08 (m, 1H), 1.41 (dd, *J* = 3.6, 12.0 Hz, 1H); <sup>13</sup>C NMR (100 MHz, CDCl<sub>3</sub>)  $\delta$  179.8, 135.7, 130.6, 118.7, 52.1, 49.8, 47.5, 44.8, 41.2, 27.3; MS-ESI found 221.0782, C<sub>10</sub>H<sub>14</sub>O<sub>4</sub> [M+Na]<sup>+</sup> requires 221.0784.

## References

- (1) Thompson, H. W.; Wong, J. K.; Lalancette, R. A.; Boyko, J. A.; Robertiello, A. M. *J. Org. Chem.*, 1985, **50**, 2115.

S3

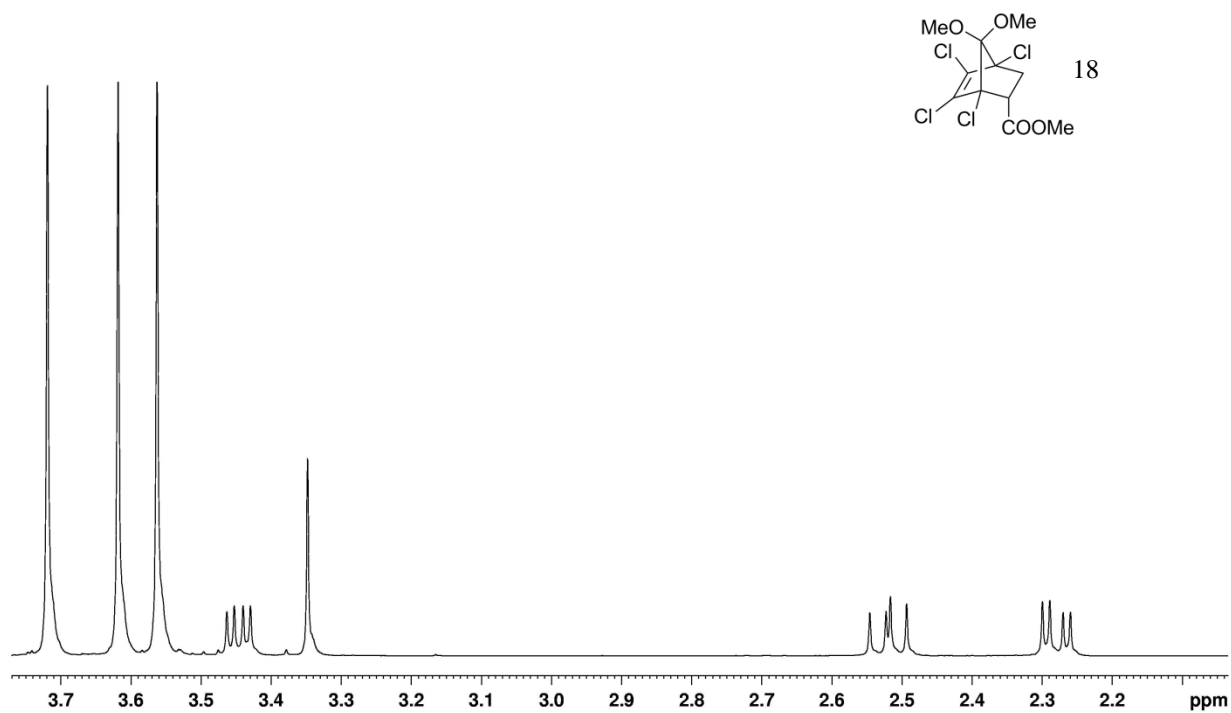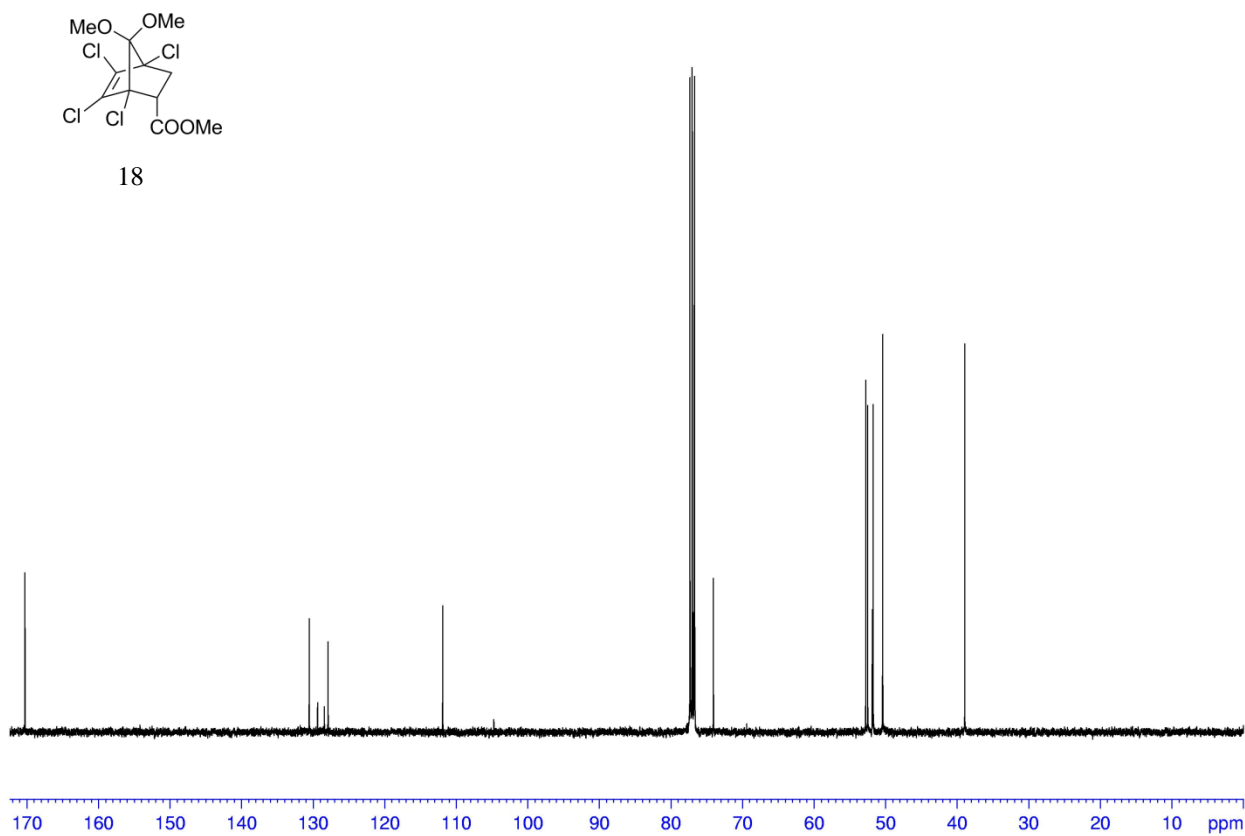

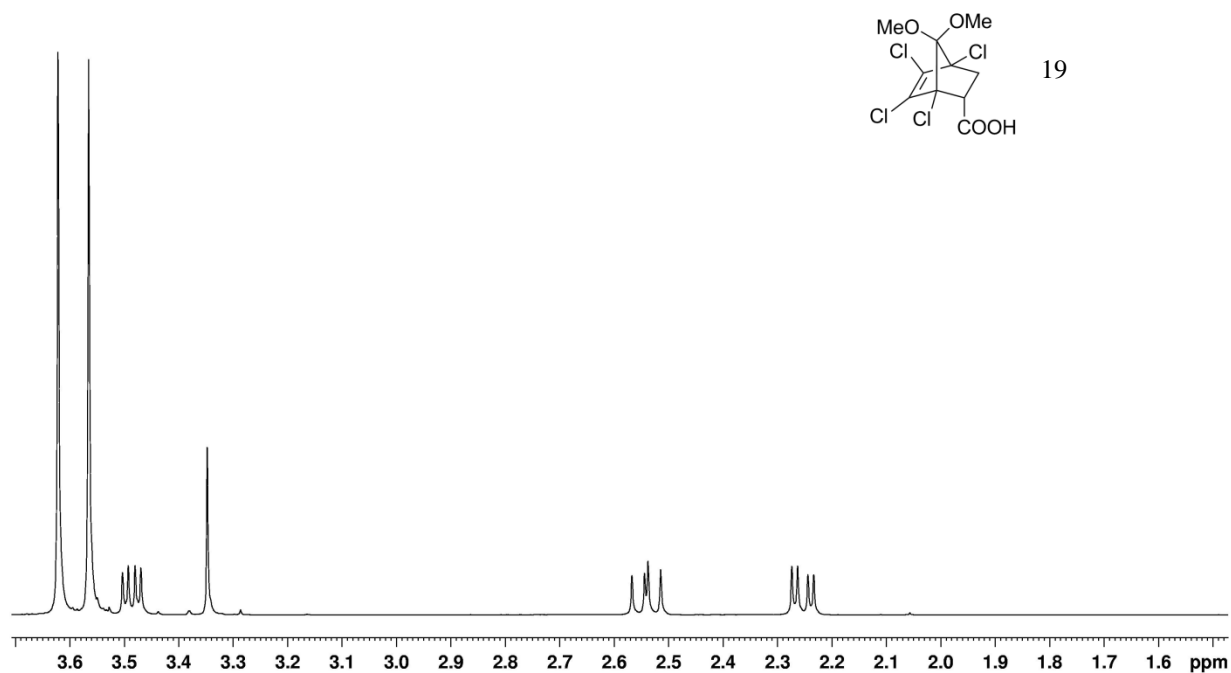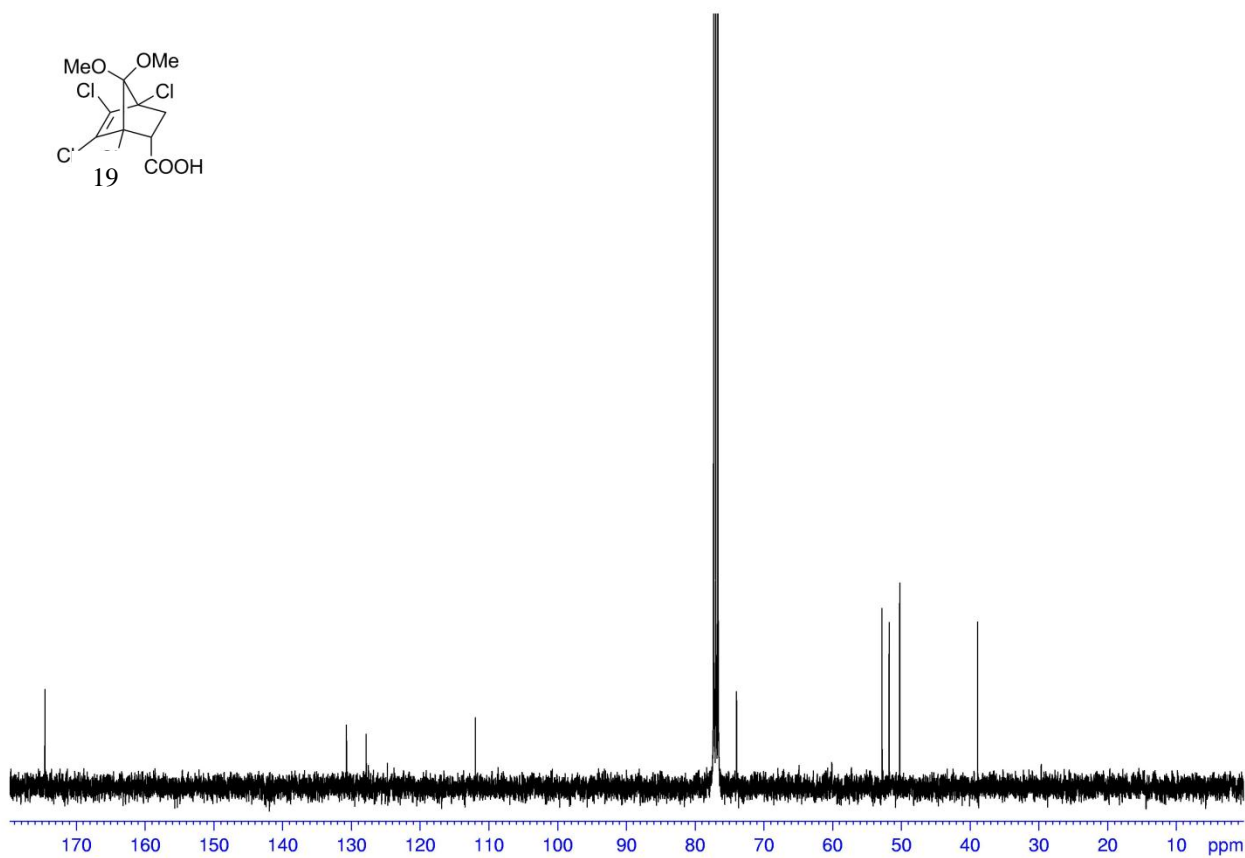

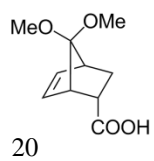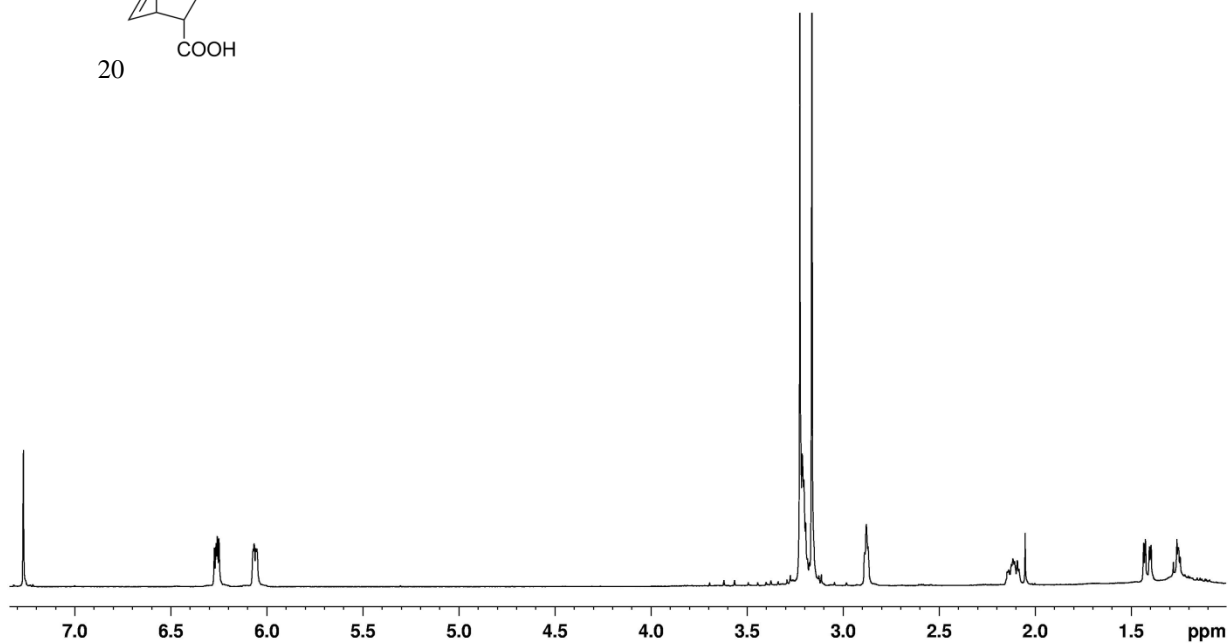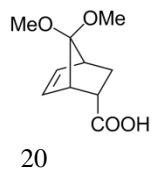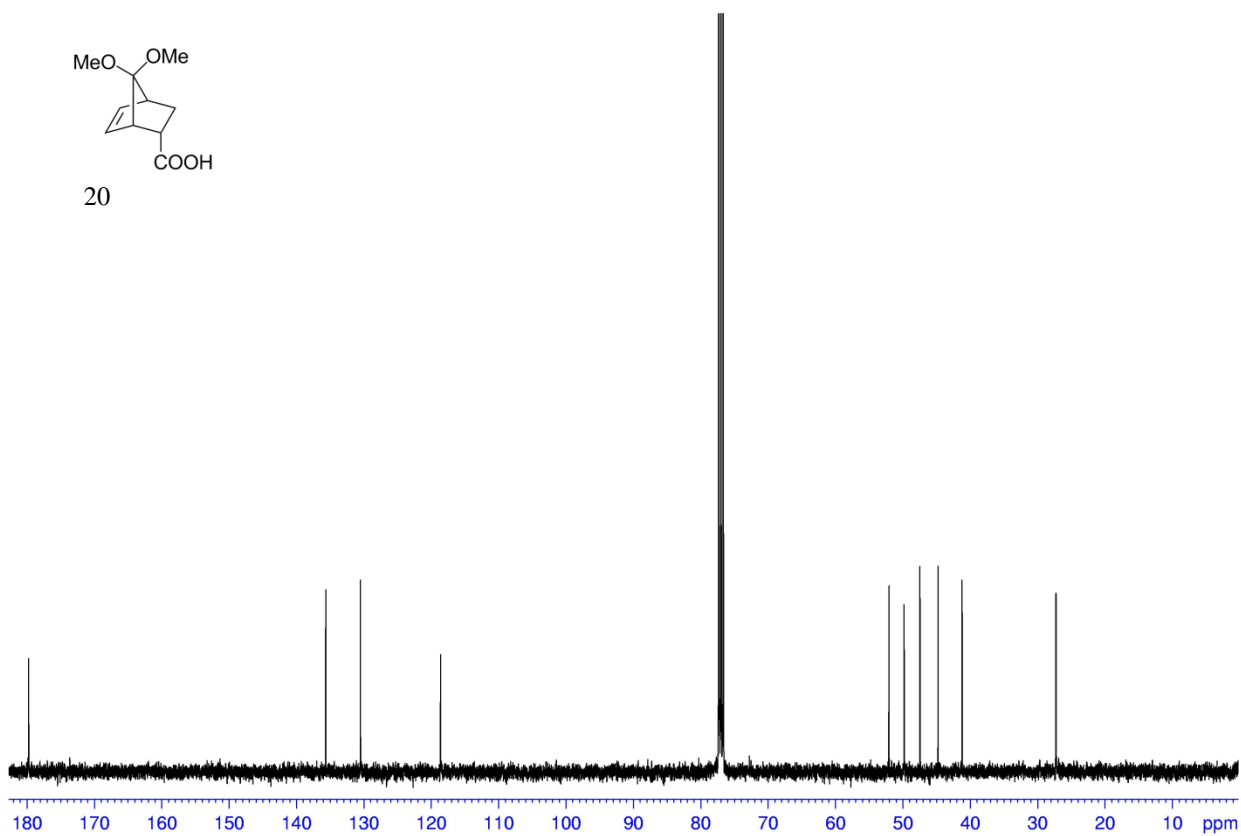

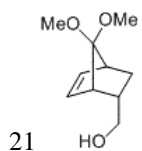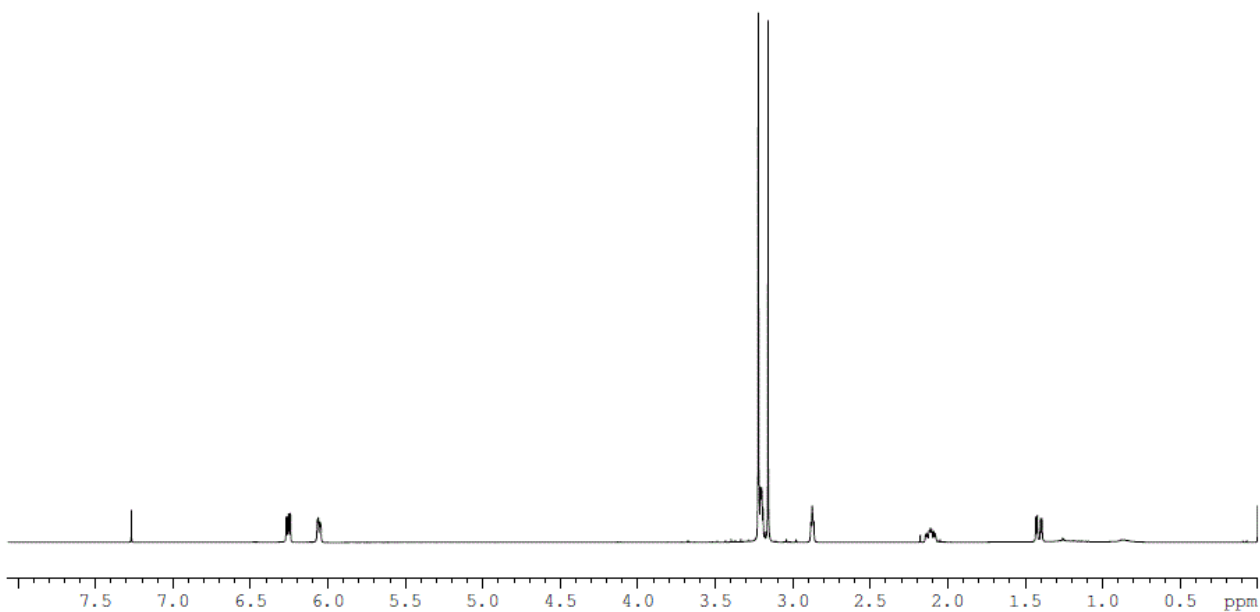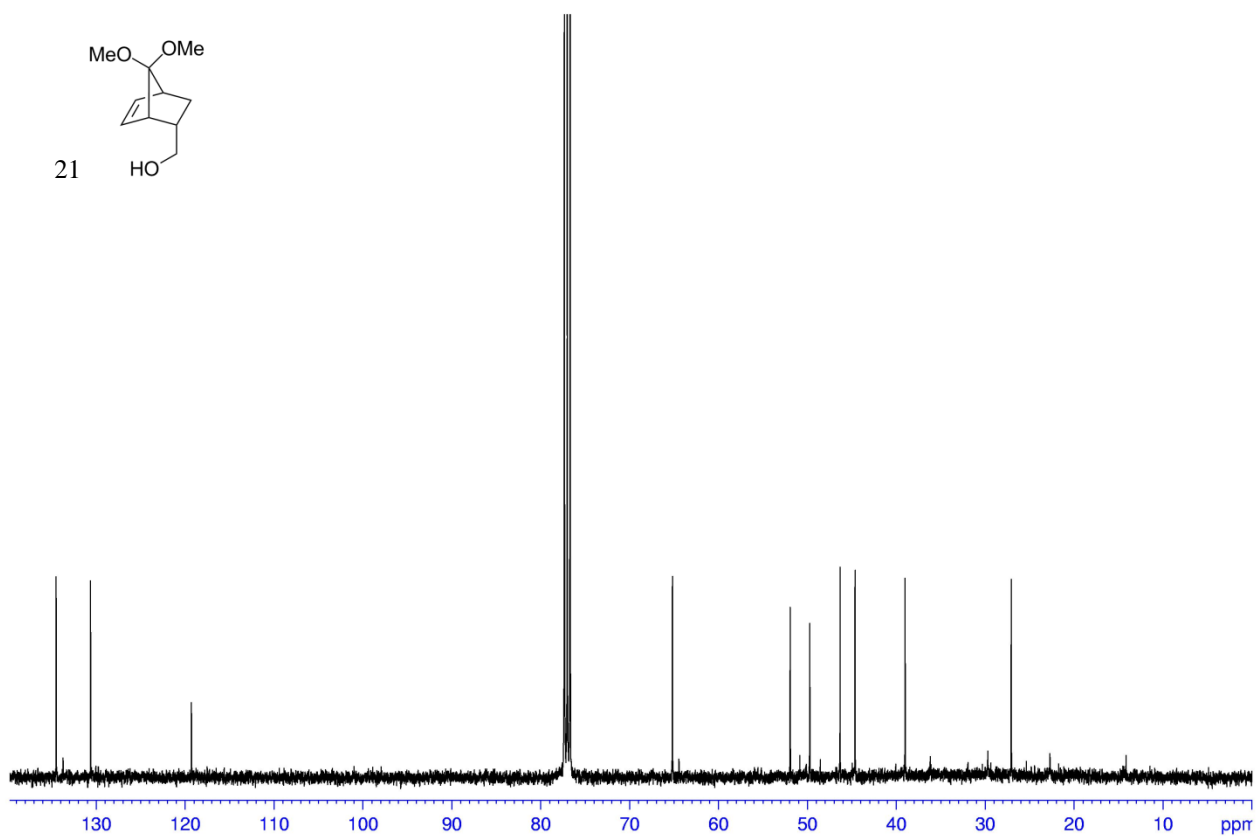

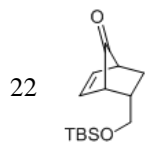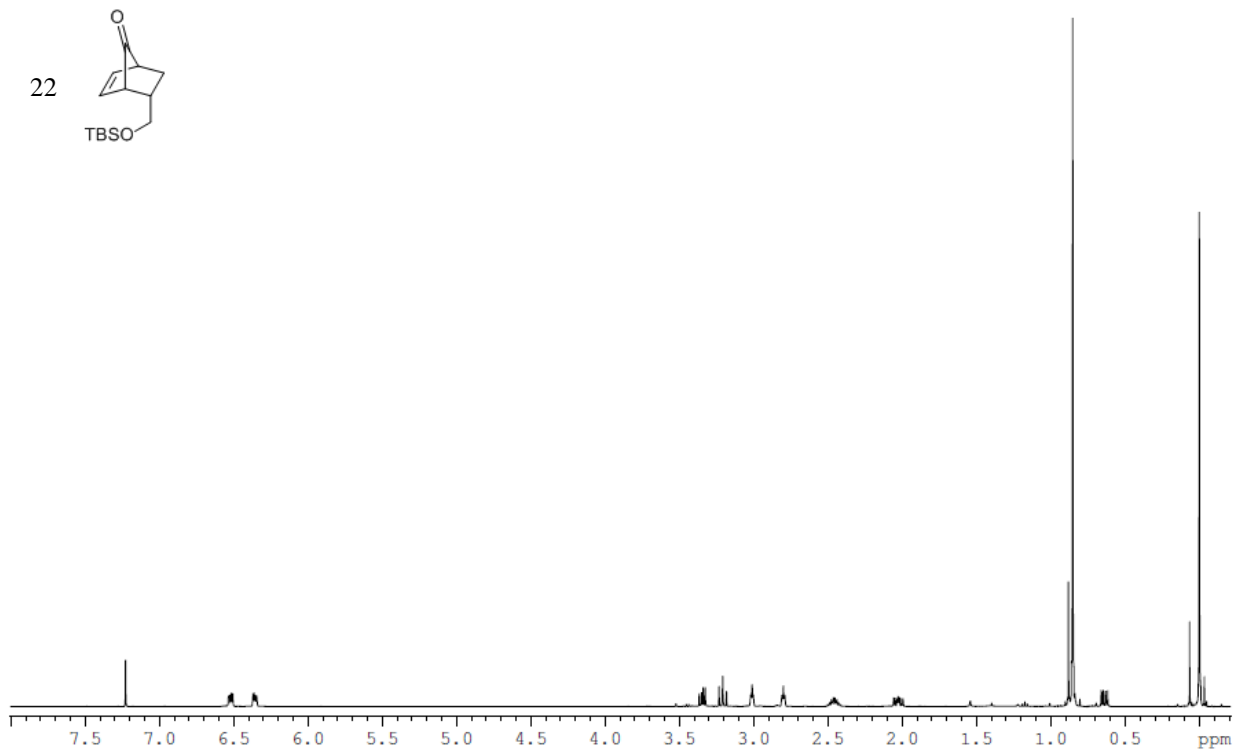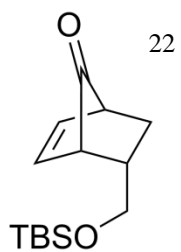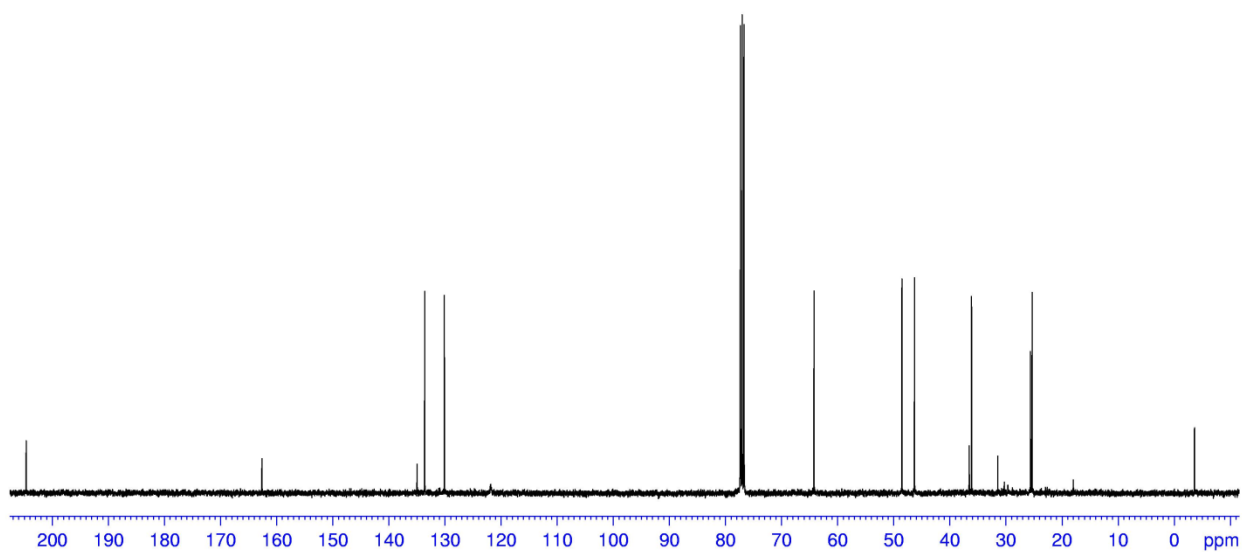

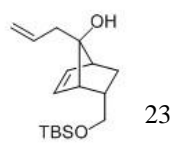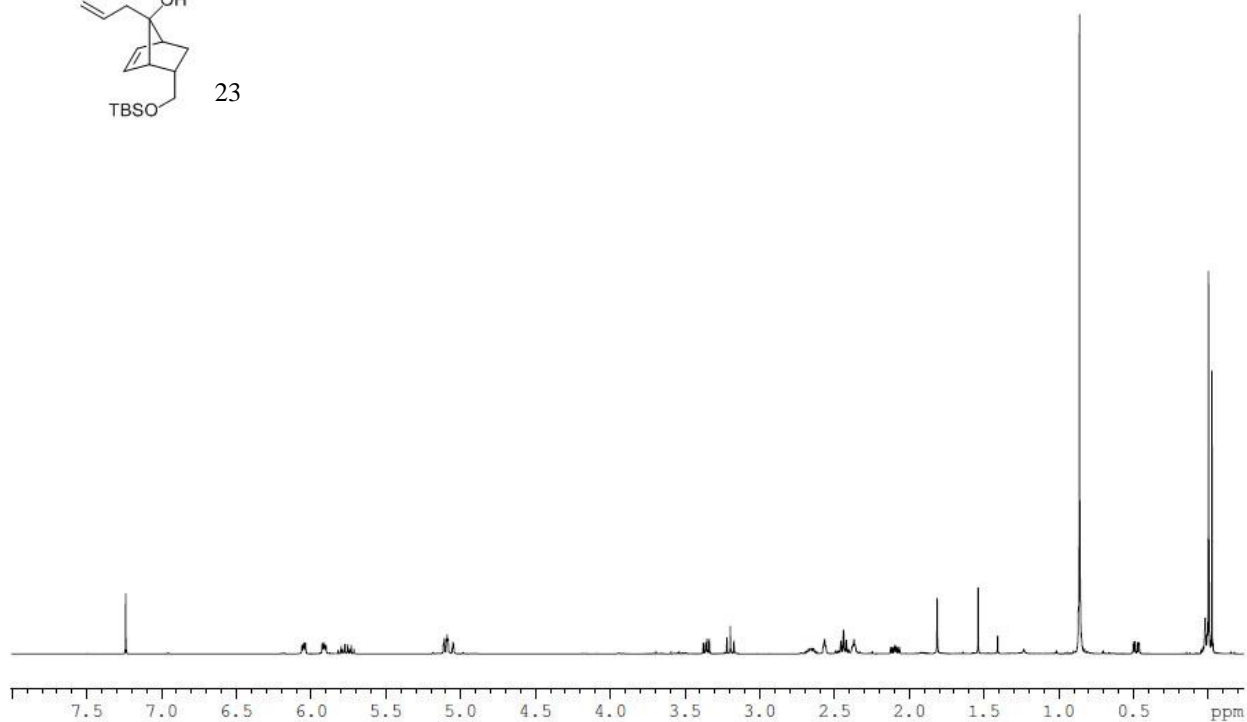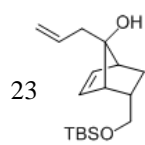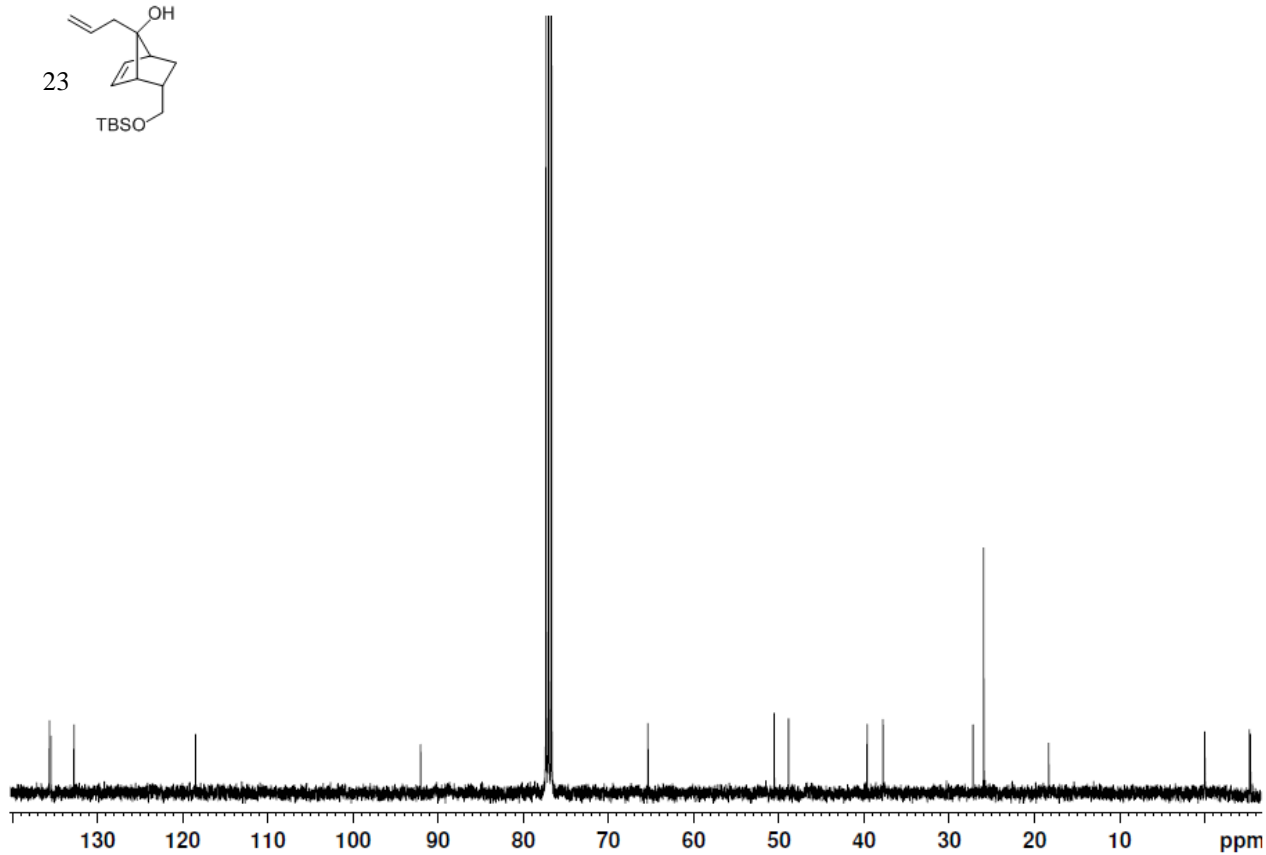



S9

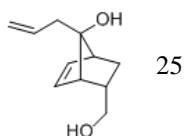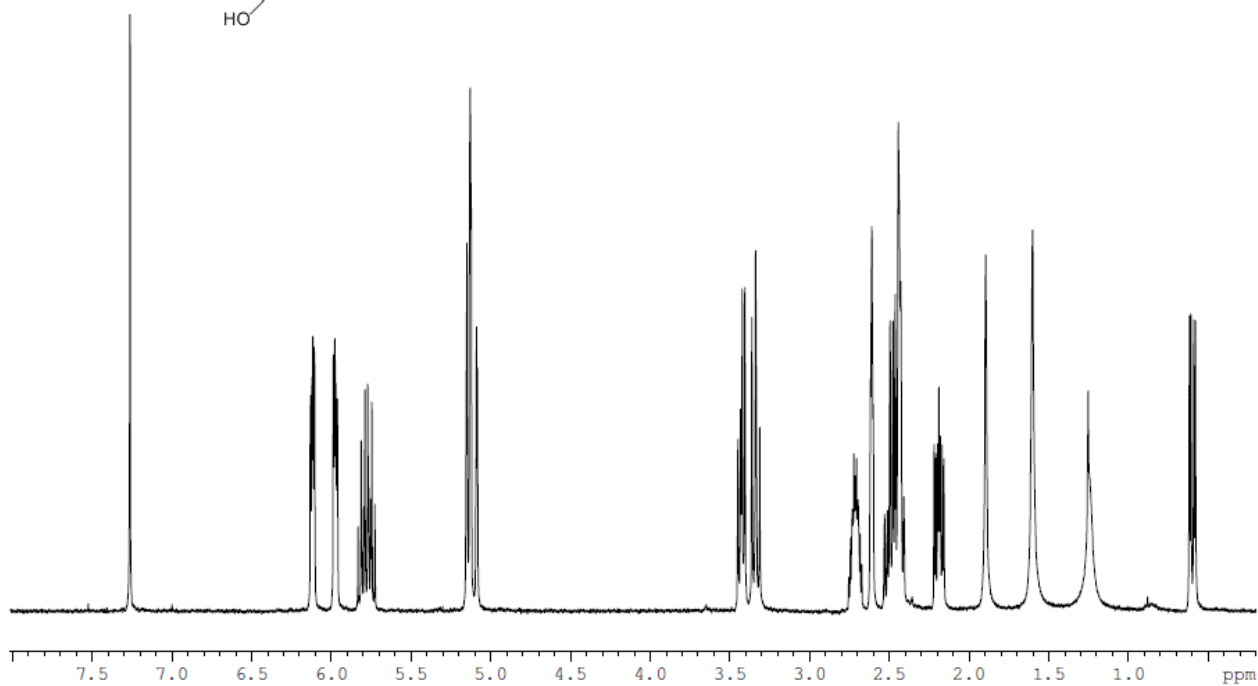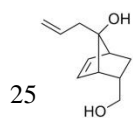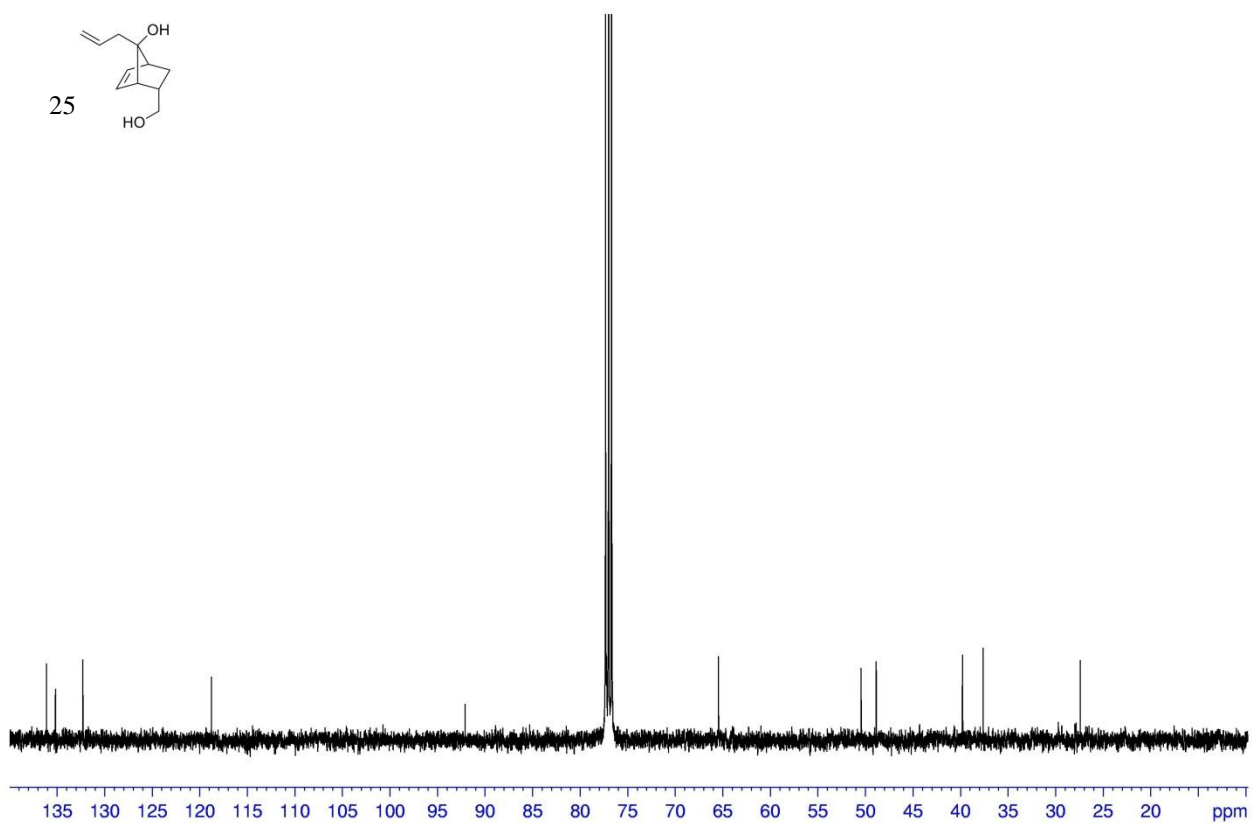



S11

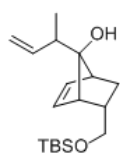

28

NB:isolated as an inseparable  
mixture of diastereoisomers

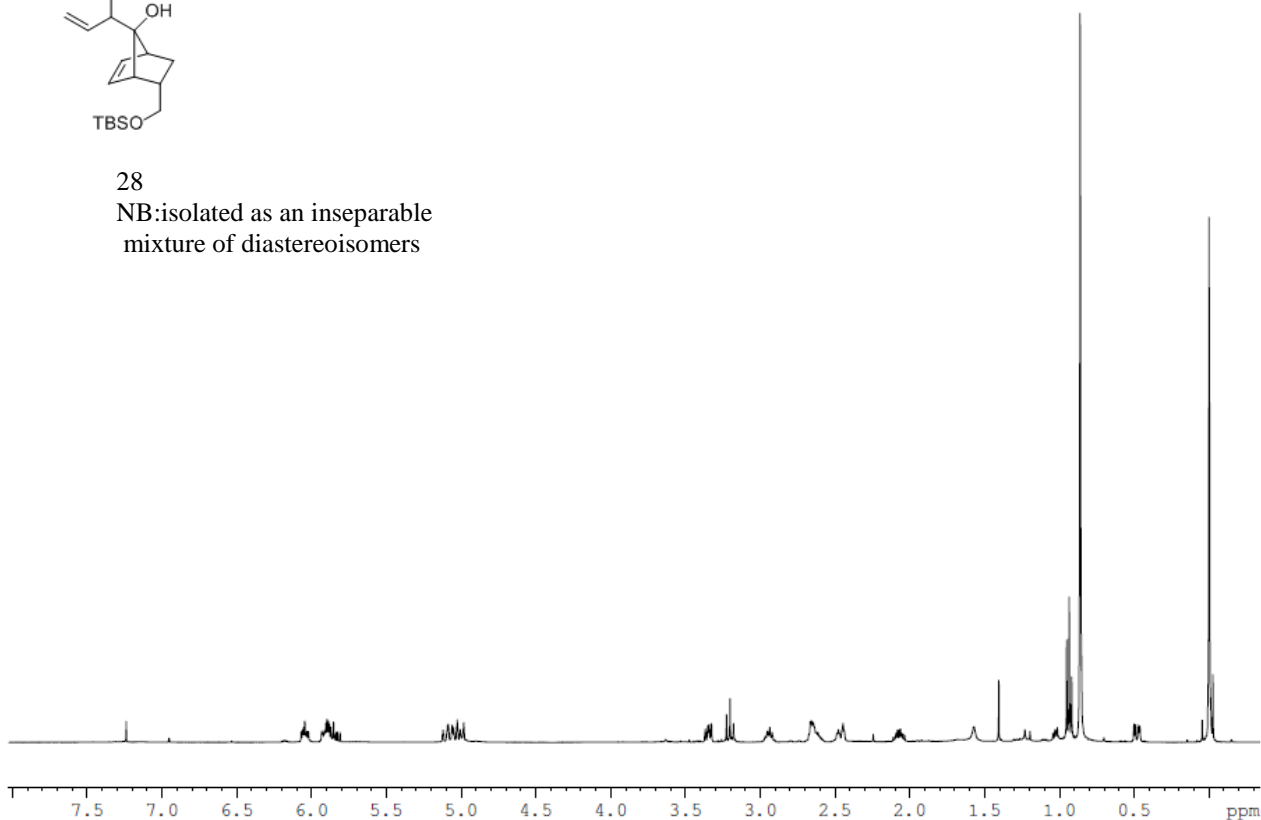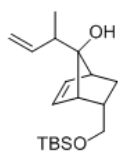

28

NB:isolated as an inseparable  
mixture of diastereoisomers

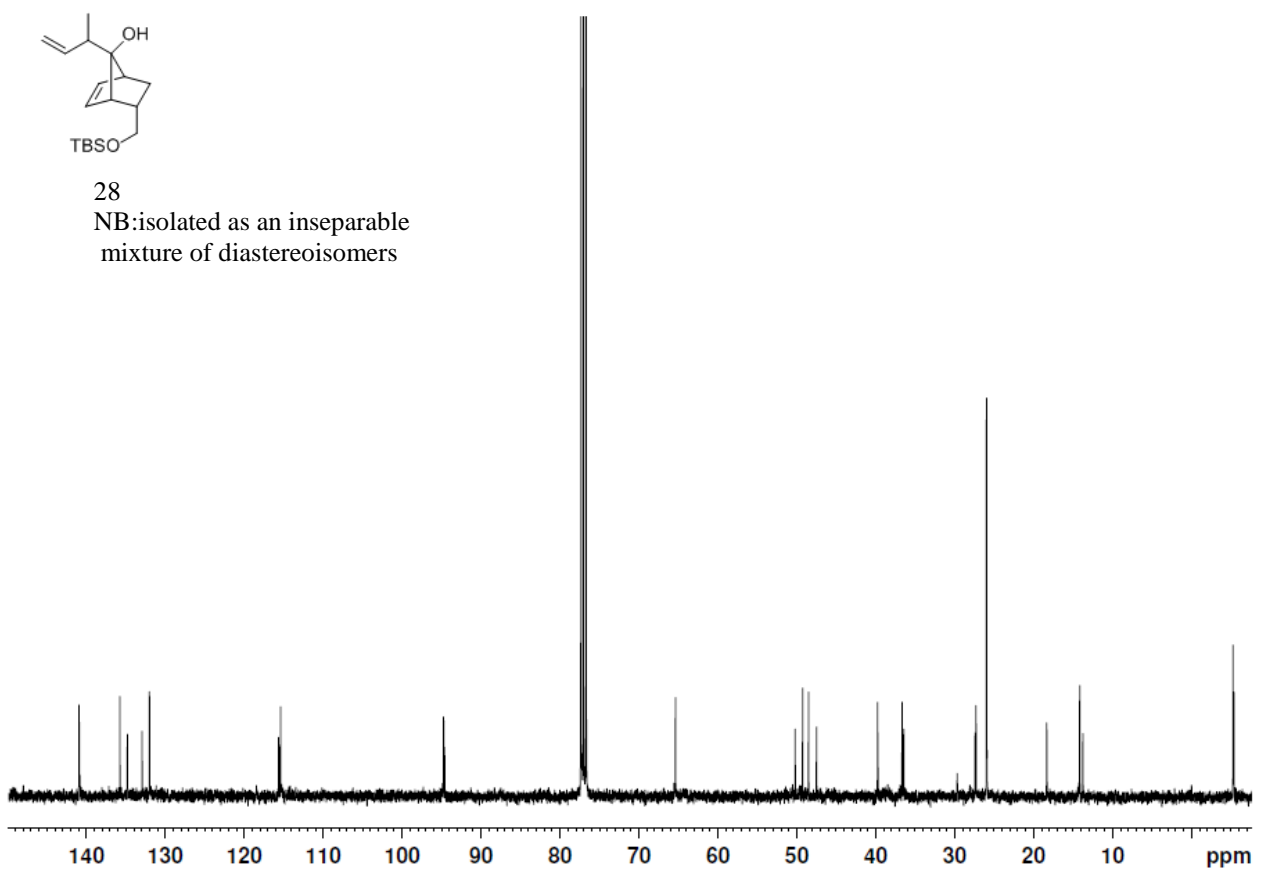

S12

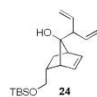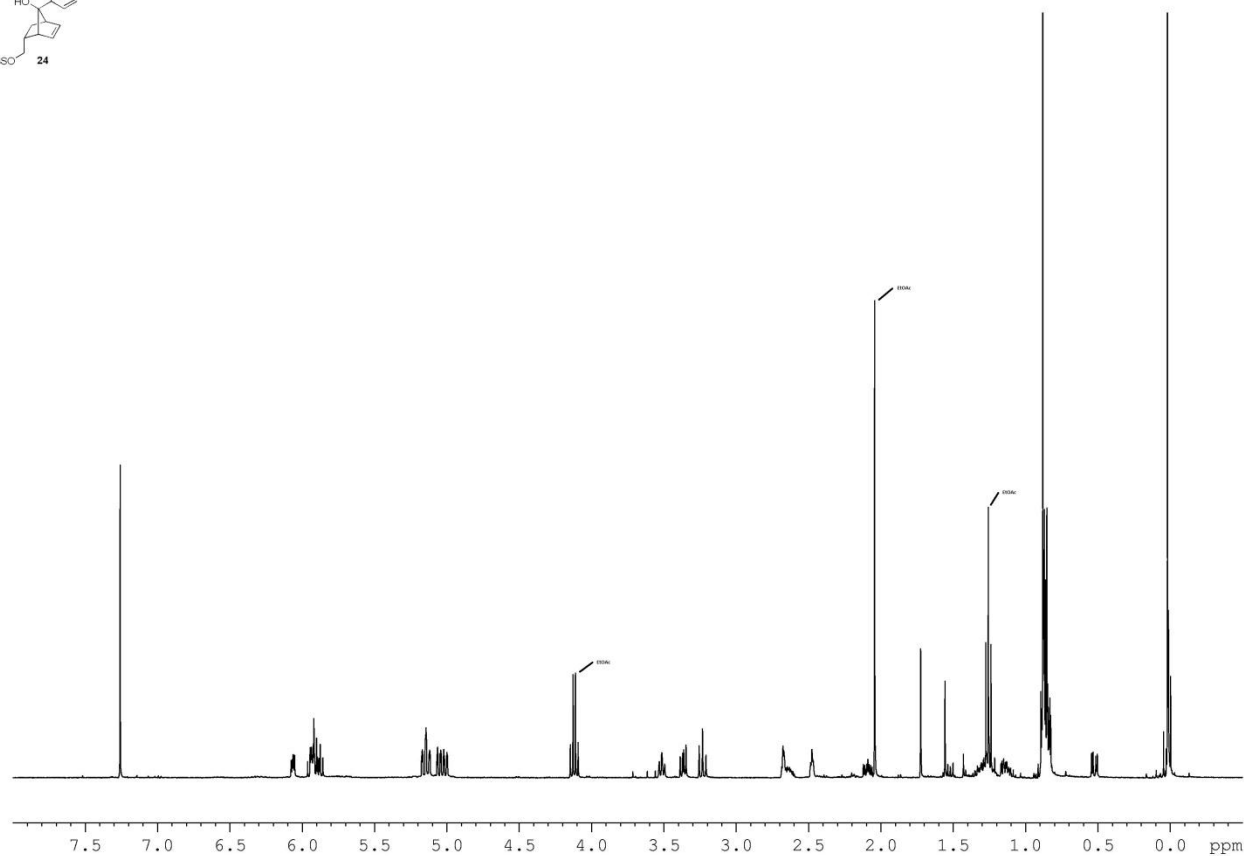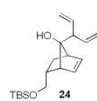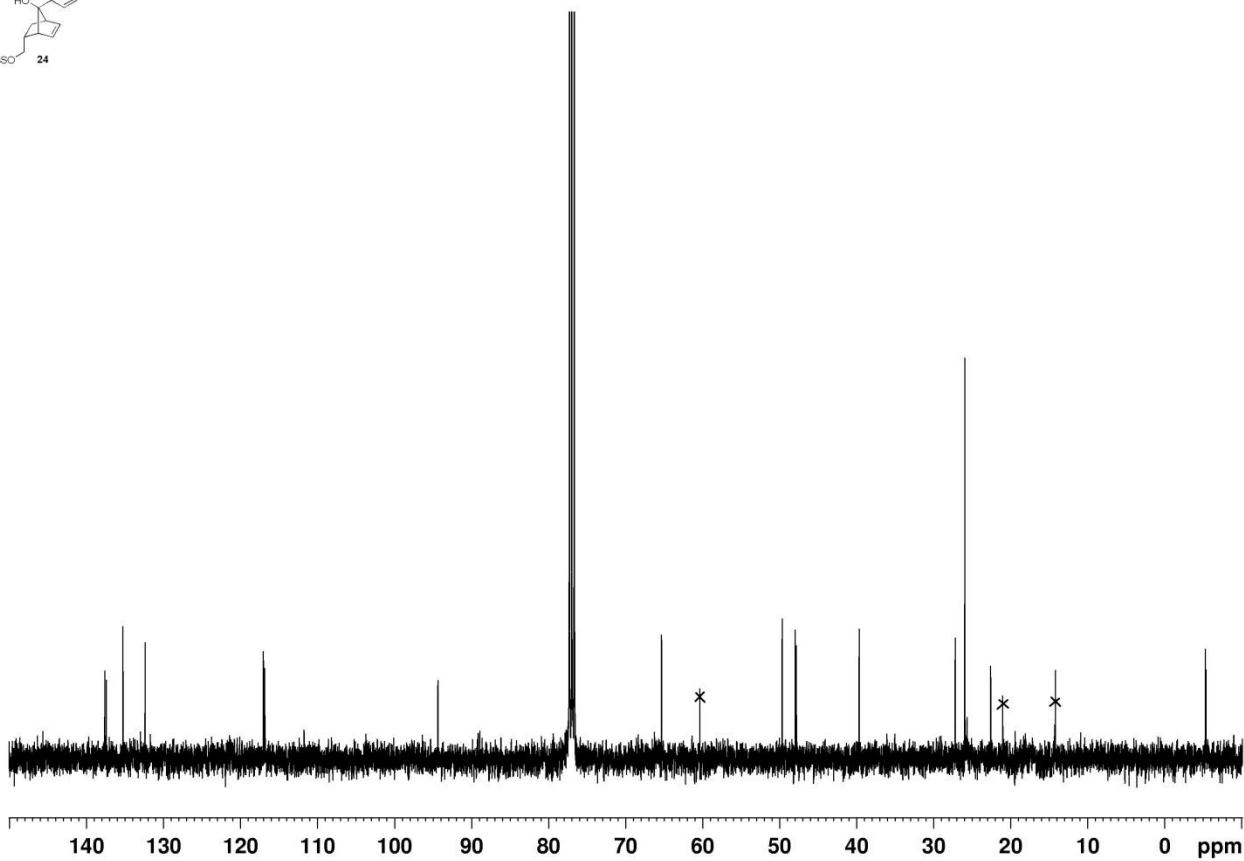

S13

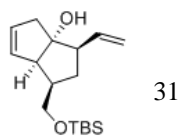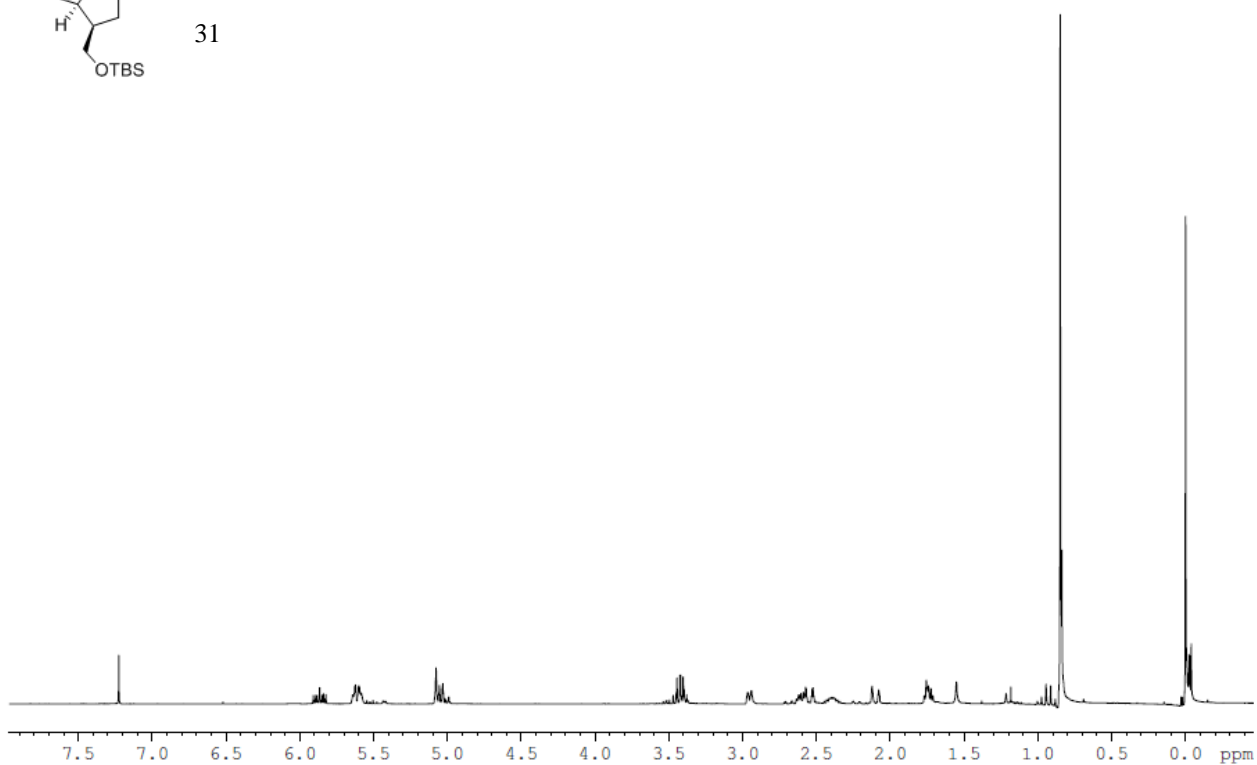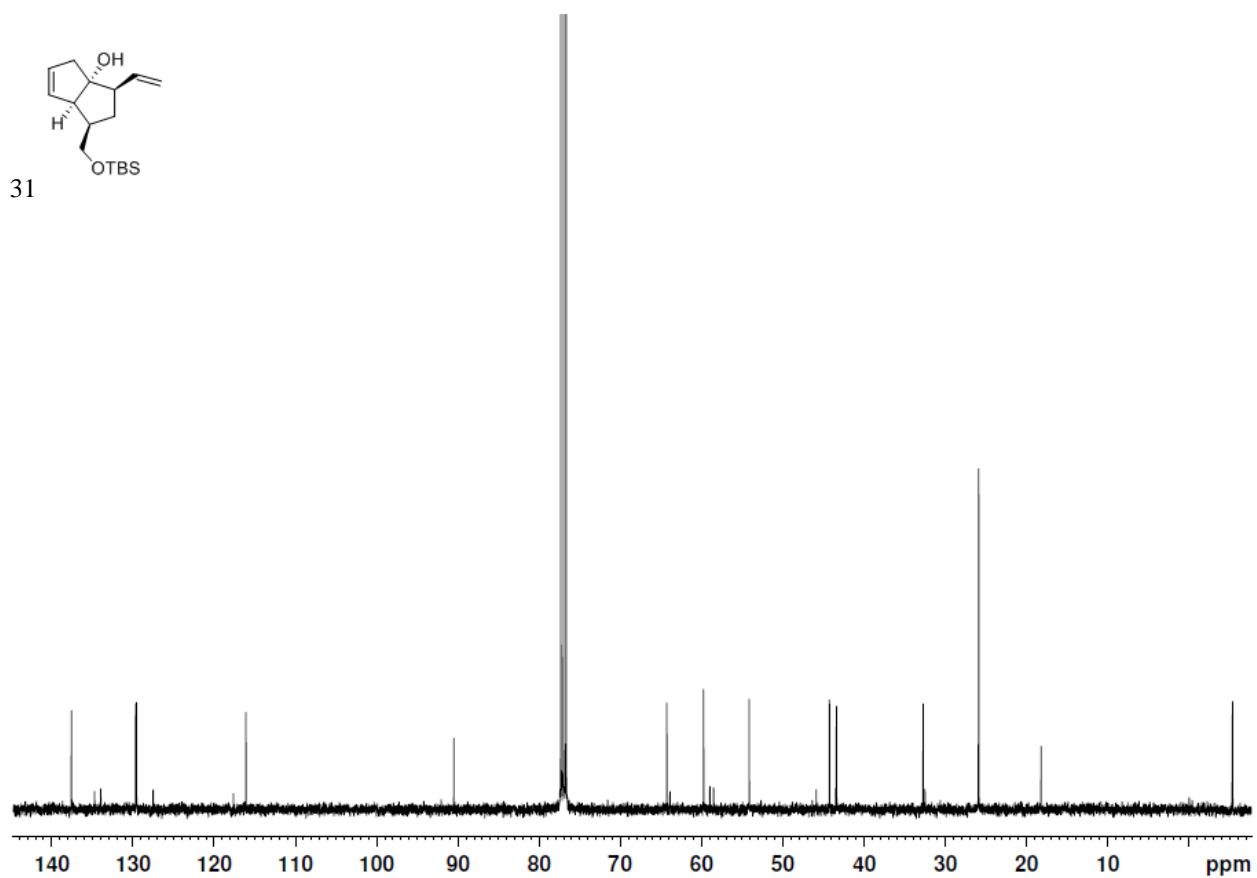

S14

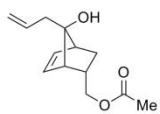

34

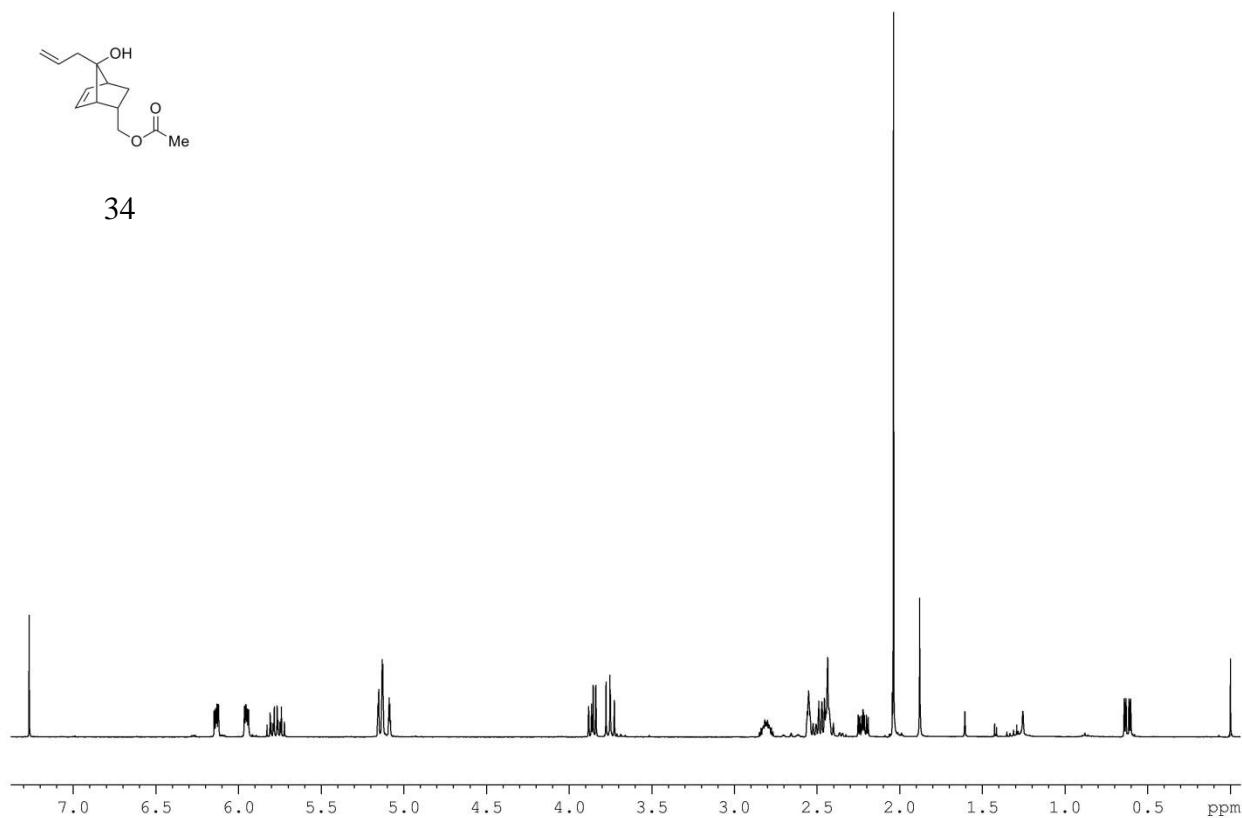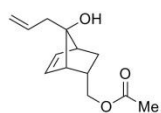

34

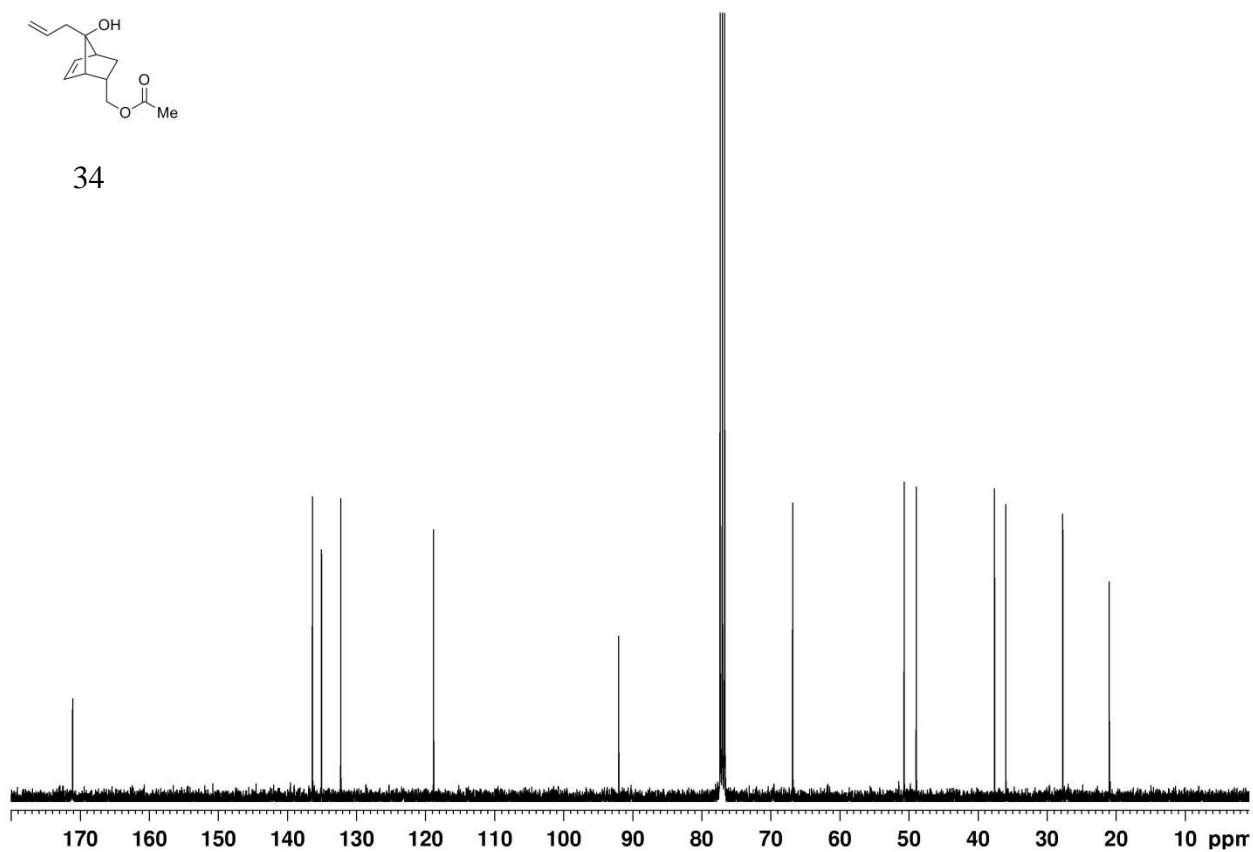

S15

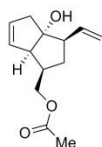

35  
Crude <sup>1</sup>H NMR indicating predominantly  
single regioisomer

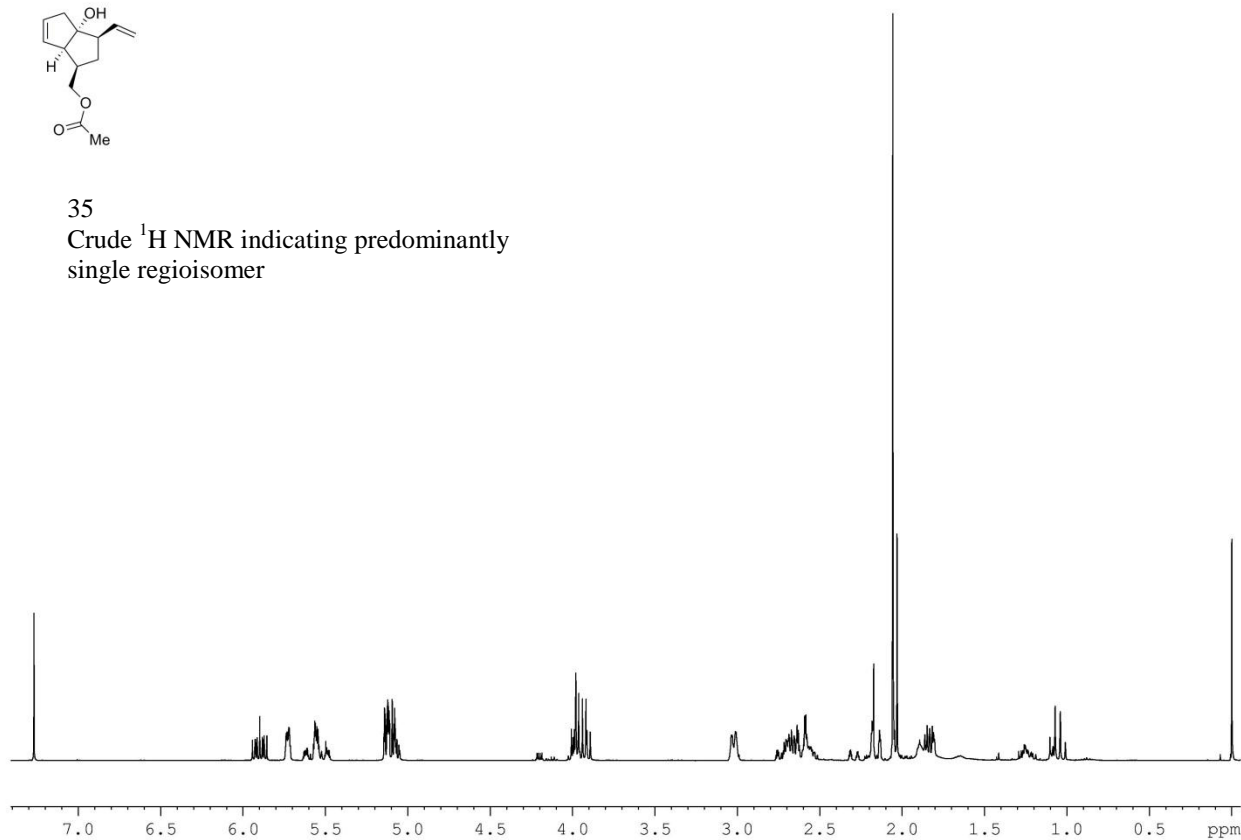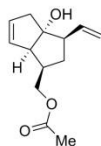

35  
Crude <sup>13</sup>C NMR indicating predominantly  
single regioisomer

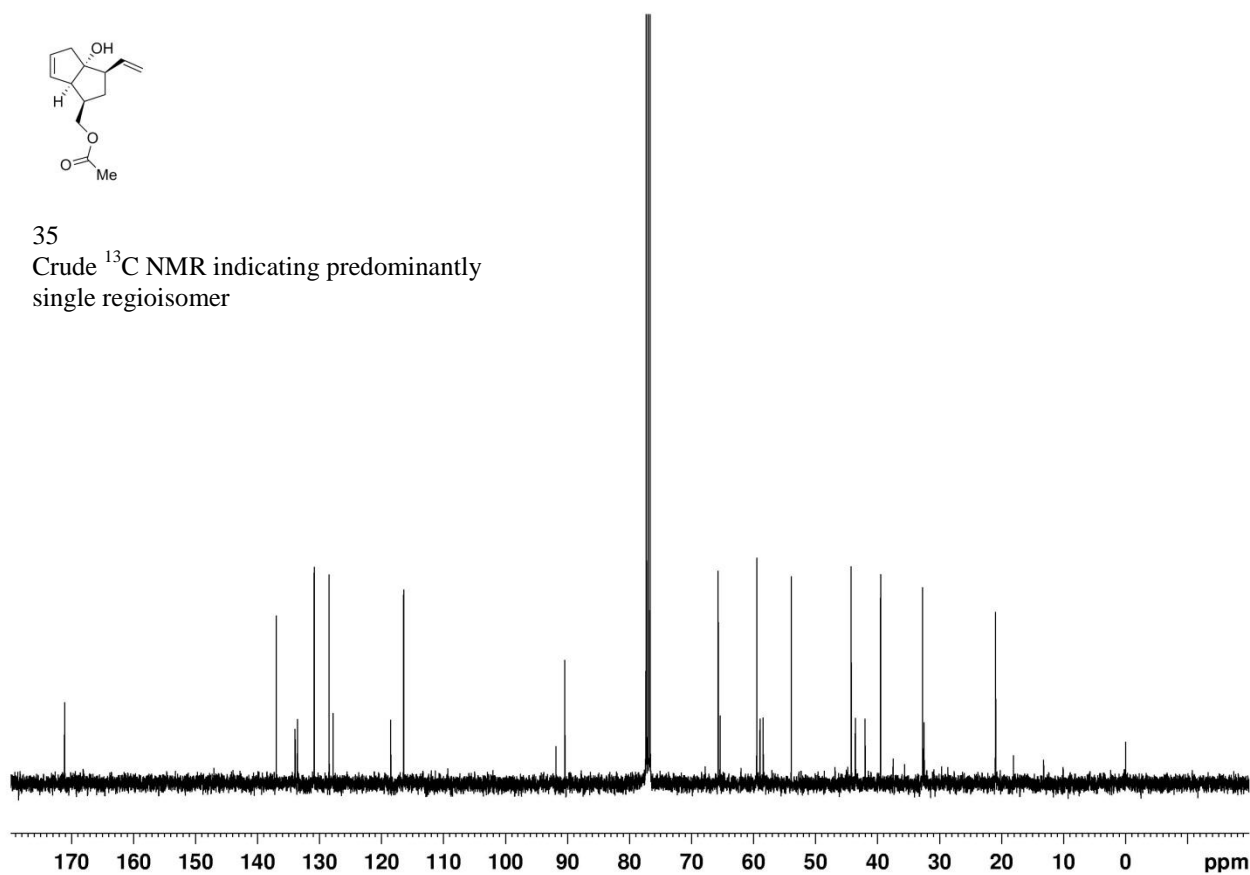

S16

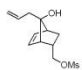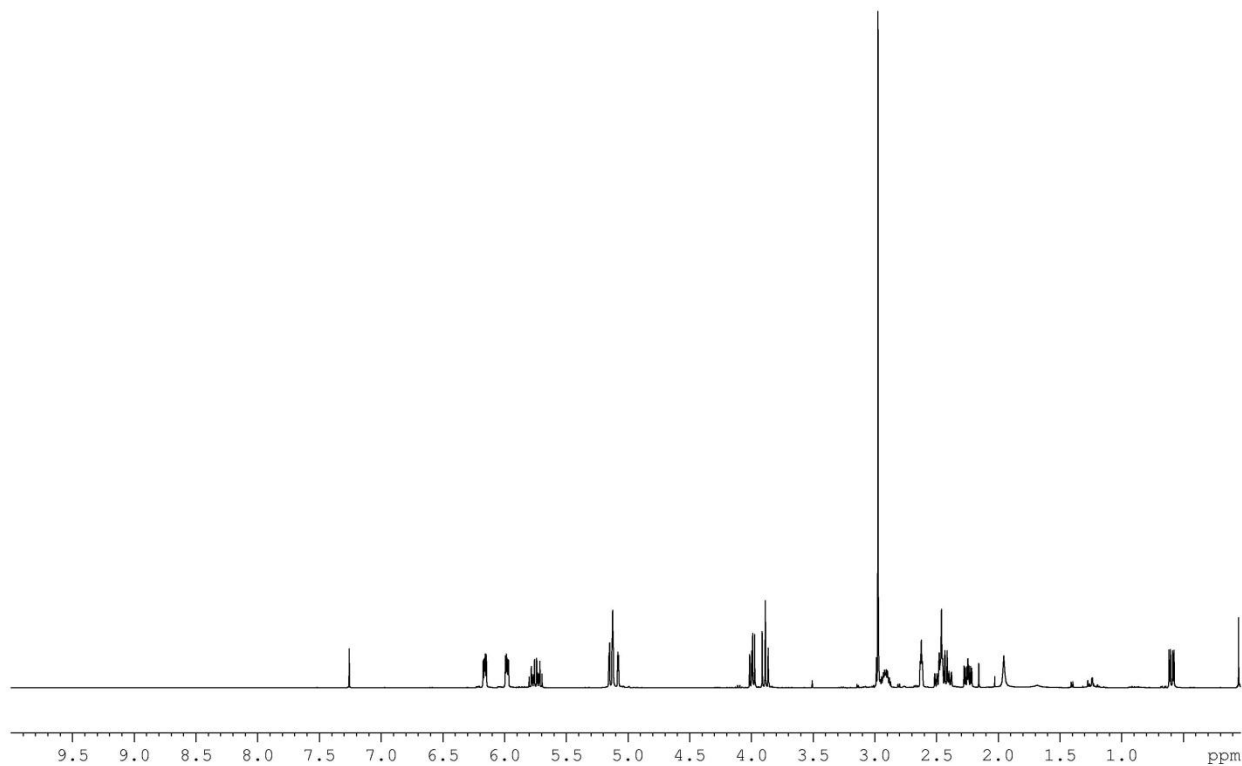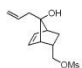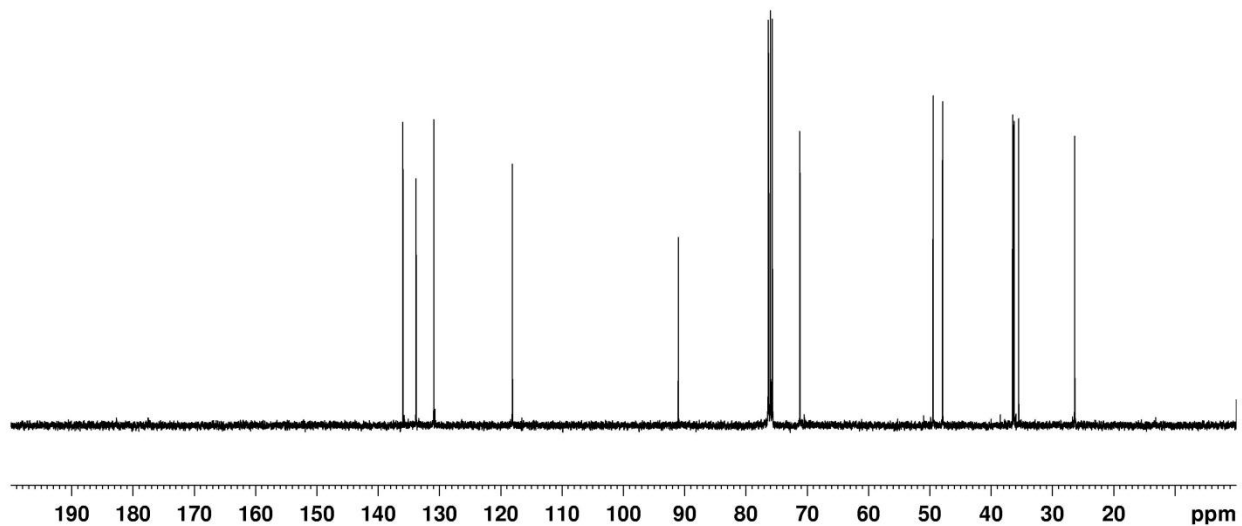



S17

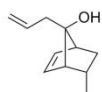

36

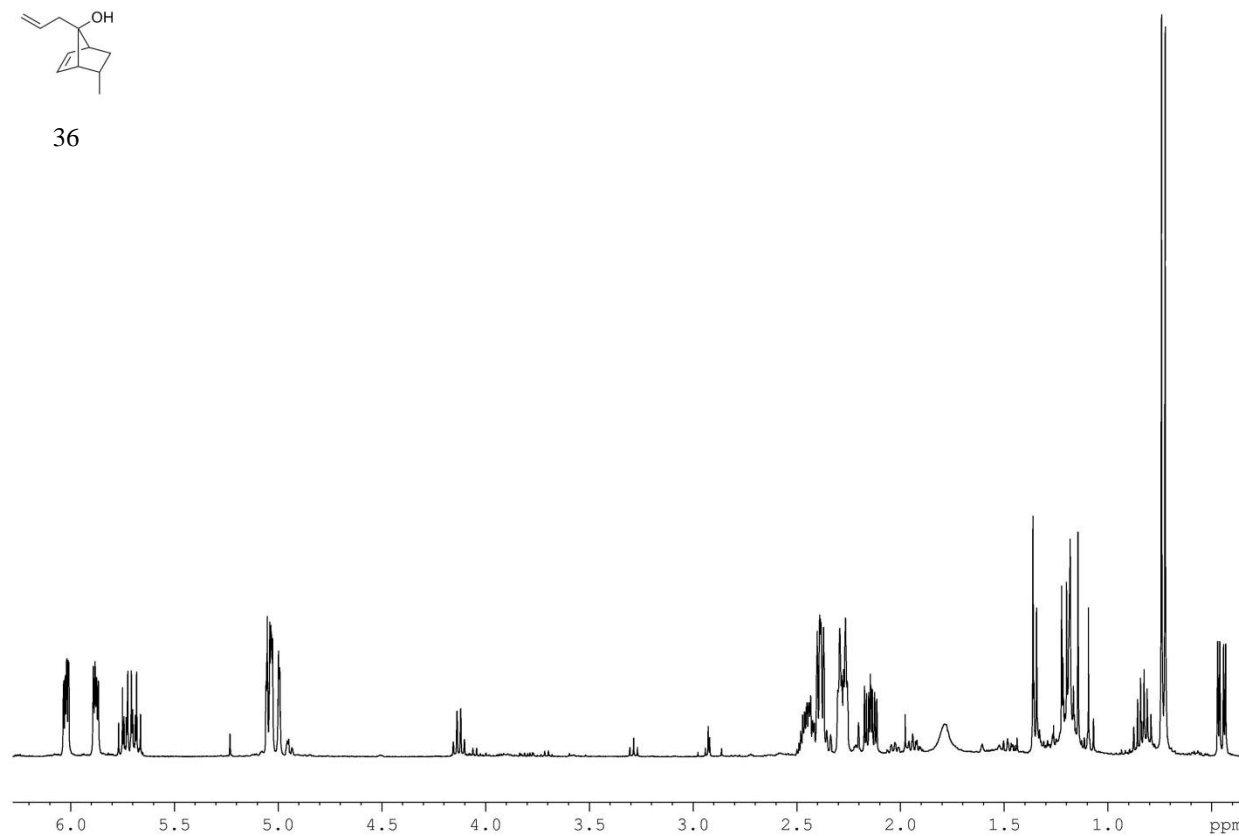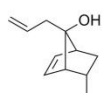

36

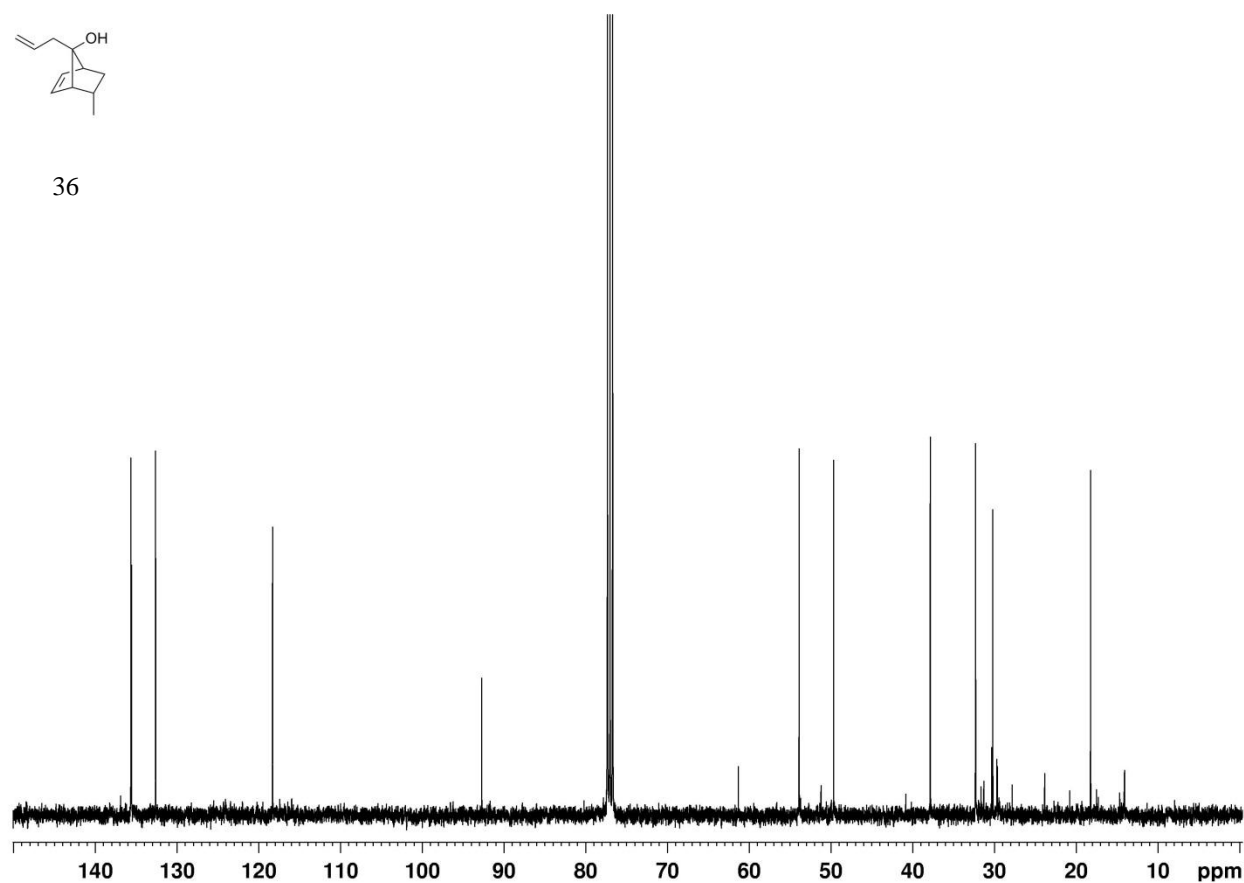

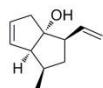

37  
Crude <sup>1</sup>H NMR indicating single regioisomer

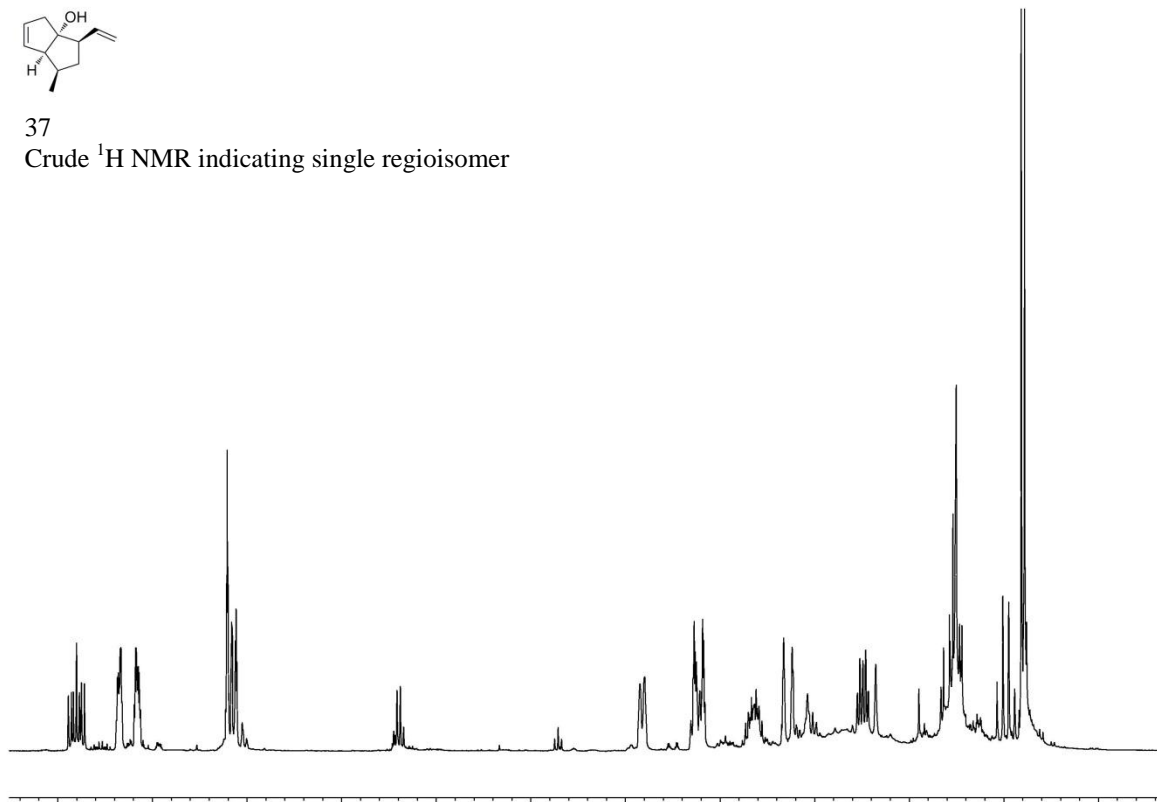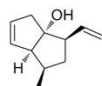

37  
Crude <sup>13</sup>C NMR indicating single regioisomer

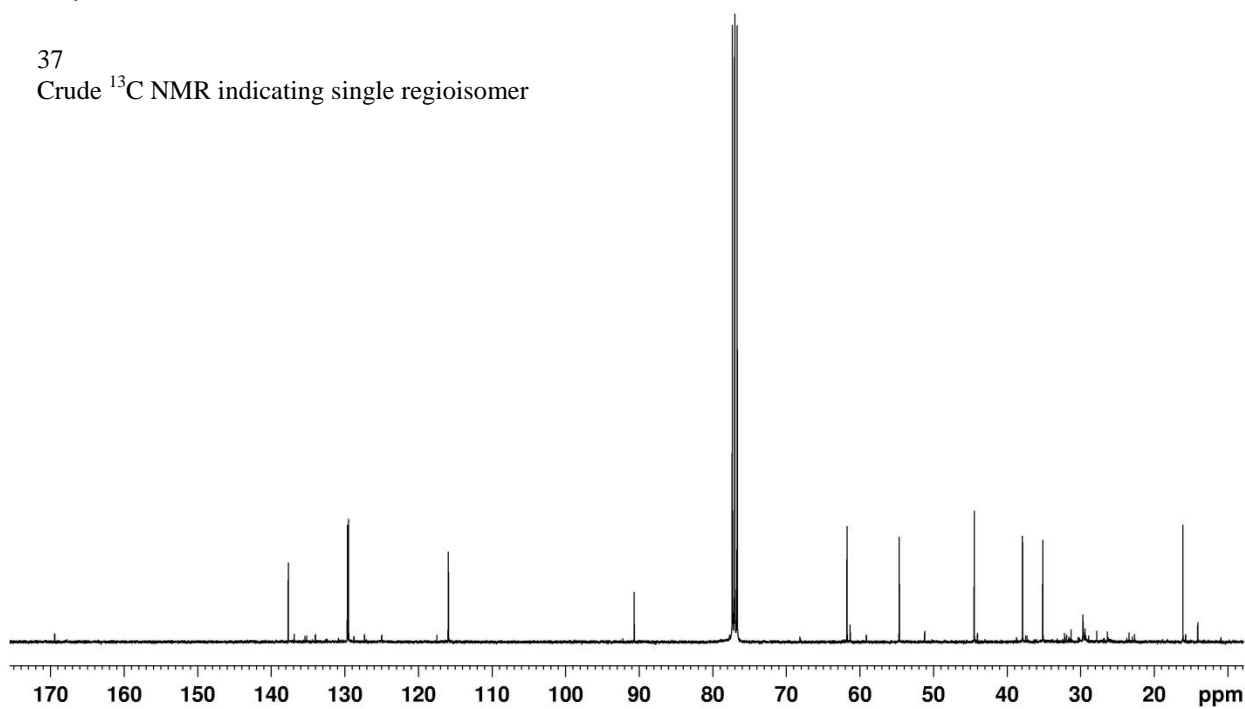

S19

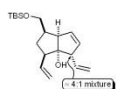

38  
 $^1\text{H}$  NMR (4:1 mixture of diastereoisomers)

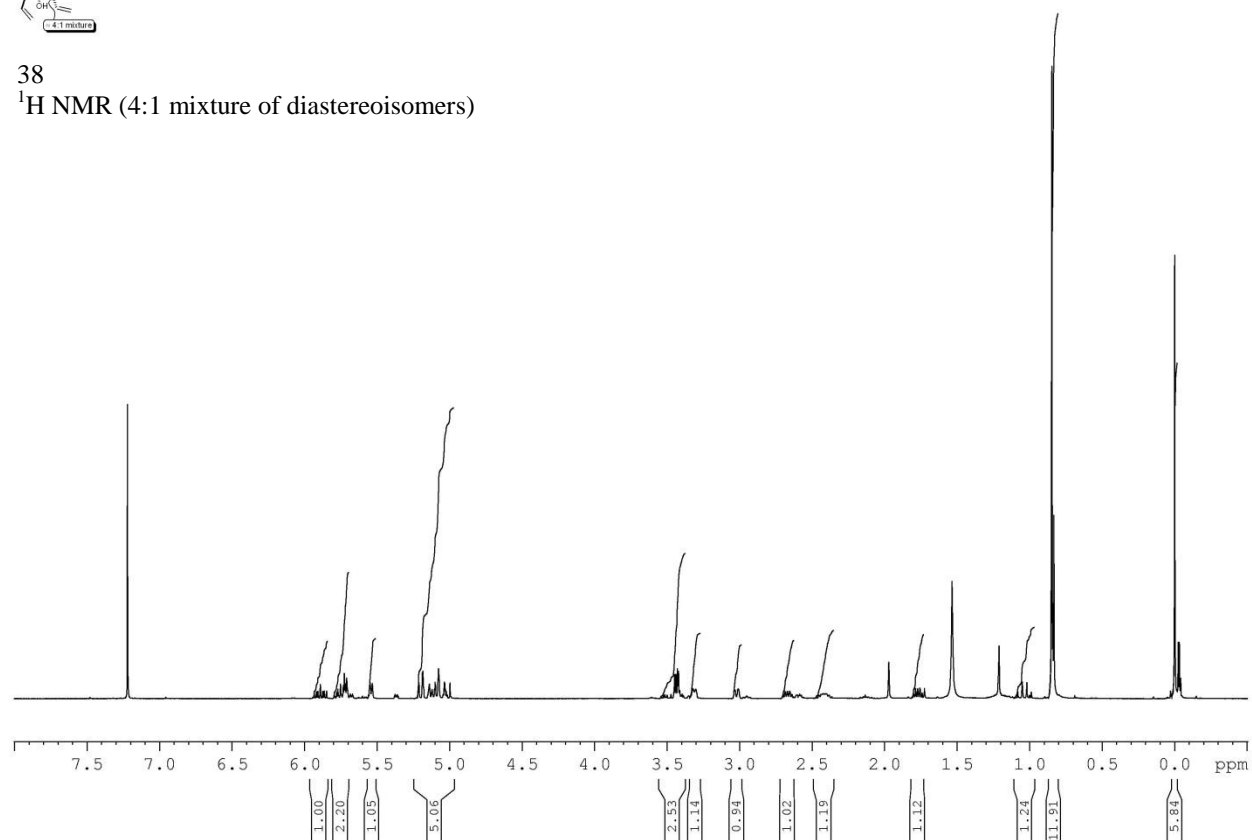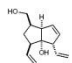

38  
 $^{13}\text{C}$  NMR (4:1 mixture of diastereoisomers)

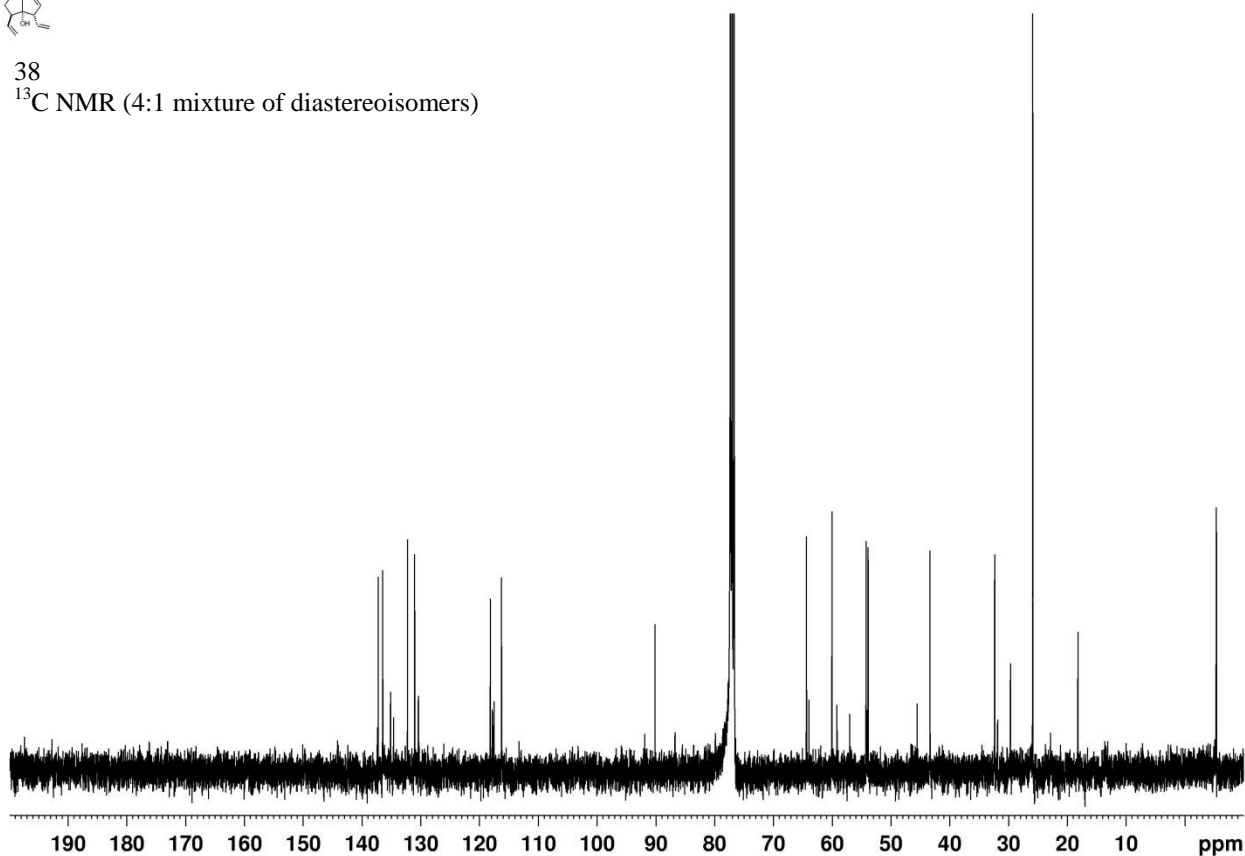

S20

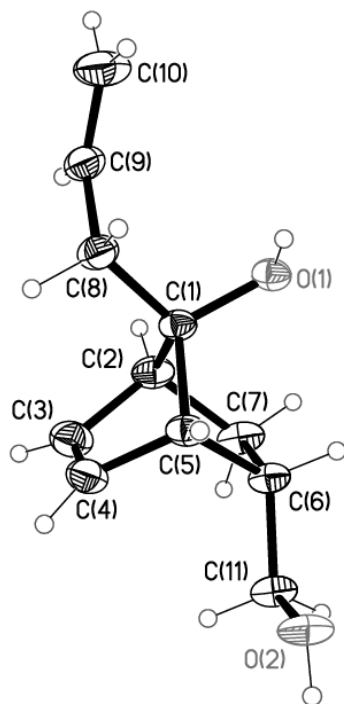

Displacement ellipsoid plot of **25** at the 50% probability level.

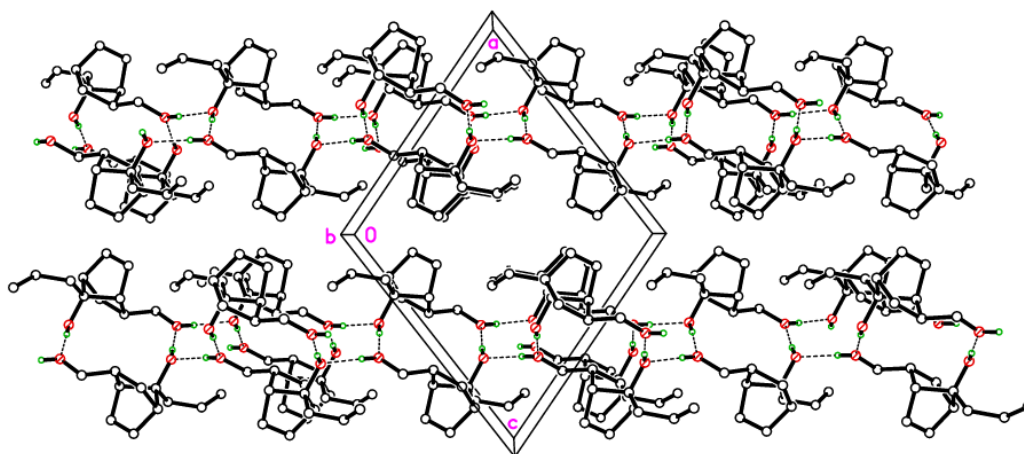

Packing plot of **25** showing the 2D layers formed by hydrogen bonds between OH groups.

**Table 1.** Crystal data and structure refinement for **25**.

|                                       |                                                                   |                   |
|---------------------------------------|-------------------------------------------------------------------|-------------------|
| Identification code                   | <b>25</b>                                                         |                   |
| Chemical formula                      | C <sub>11</sub> H <sub>16</sub> O <sub>2</sub>                    |                   |
| Formula weight                        | 180.24                                                            |                   |
| Temperature                           | 150(2) K                                                          |                   |
| Radiation, wavelength                 | synchrotron, 0.7749 Å                                             |                   |
| Crystal system, space group           | monoclinic, P2 <sub>1</sub> /n                                    |                   |
| Unit cell parameters                  | a = 11.3188(14) Å                                                 | α = 90°           |
|                                       | b = 7.8255(10) Å                                                  | β = 107.7750(18)° |
|                                       | c = 11.8409(15) Å                                                 | γ = 90°           |
| Cell volume                           | 998.7(2) Å <sup>3</sup>                                           |                   |
| Z                                     | 4                                                                 |                   |
| Calculated density                    | 1.199 g/cm <sup>3</sup>                                           |                   |
| Absorption coefficient μ              | 0.081 mm <sup>-1</sup>                                            |                   |
| F(000)                                | 392                                                               |                   |
| Crystal colour and size               | colourless, 0.20 × 0.20 × 0.08 mm <sup>3</sup>                    |                   |
| Reflections for cell refinement       | 6497 (θ range 3.46 to 33.60°)                                     |                   |
| Data collection method                | Bruker APEX 2 CCD diffractometer<br>ω rotation with narrow frames |                   |
| θ range for data collection           | 3.46 to 33.62°                                                    |                   |
| Index ranges                          | h -16 to 16, k -11 to 11, l -16 to 16                             |                   |
| Completeness to θ = 33.62°            | 99.2 %                                                            |                   |
| Intensity decay                       | 0%                                                                |                   |
| Reflections collected                 | 14038                                                             |                   |
| Independent reflections               | 3034 (R <sub>int</sub> = 0.0311)                                  |                   |
| Reflections with F <sup>2</sup> > 2σ  | 2659                                                              |                   |
| Absorption correction                 | semi-empirical from equivalents                                   |                   |
| Min. and max. transmission            | 0.984 and 0.994                                                   |                   |
| Structure solution                    | direct methods                                                    |                   |
| Refinement method                     | Full-matrix least-squares on F <sup>2</sup>                       |                   |
| Weighting parameters a, b             | 0.0621, 0.1811                                                    |                   |
| Data / restraints / parameters        | 3034 / 0 / 120                                                    |                   |
| Final R indices [F <sup>2</sup> > 2σ] | R1 = 0.0391, wR2 = 0.1093                                         |                   |
| R indices (all data)                  | R1 = 0.0441, wR2 = 0.1141                                         |                   |
| Goodness-of-fit on F <sup>2</sup>     | 1.045                                                             |                   |
| Largest and mean shift/su             | 0.000 and 0.000                                                   |                   |
| Largest diff. peak and hole           | 0.328 and -0.185 e Å <sup>-3</sup>                                |                   |

Acknowledgement: The Advanced Light Source is supported by the Director, Office of Science, Office of Basic Energy Sciences, of the U.S. Department of Energy under Contract No. DE-AC02-05CH11231.

**Table 2.** Atomic coordinates and equivalent isotropic displacement parameters ( $\text{\AA}^2$ ) for **25**.  $U_{\text{eq}}$  is defined as one third of the trace of the orthogonalized  $U^{\text{ij}}$  tensor.

|       | x           | y            | z           | $U_{\text{eq}}$ |
|-------|-------------|--------------|-------------|-----------------|
| O(1)  | 0.37404(5)  | 0.04096(7)   | 0.79369(5)  | 0.02265(14)     |
| C(1)  | 0.49572(7)  | 0.03635(10)  | 0.78060(7)  | 0.02147(16)     |
| C(2)  | 0.51887(8)  | 0.20243(11)  | 0.71900(7)  | 0.02679(18)     |
| C(3)  | 0.65772(9)  | 0.19017(14)  | 0.74291(9)  | 0.0338(2)       |
| C(4)  | 0.70616(8)  | 0.11714(12)  | 0.84910(8)  | 0.03000(19)     |
| C(5)  | 0.60027(7)  | 0.07841(10)  | 0.89816(7)  | 0.02227(16)     |
| C(6)  | 0.55306(8)  | 0.25416(10)  | 0.93041(7)  | 0.02337(17)     |
| C(7)  | 0.50013(9)  | 0.34099(11)  | 0.80680(8)  | 0.02870(19)     |
| C(8)  | 0.51324(8)  | -0.13361(11) | 0.72280(8)  | 0.02805(19)     |
| C(9)  | 0.42127(9)  | -0.15931(12) | 0.60253(8)  | 0.02950(19)     |
| C(10) | 0.33824(12) | -0.28210(16) | 0.57436(10) | 0.0449(3)       |
| C(11) | 0.65197(8)  | 0.36001(11)  | 1.01765(8)  | 0.02695(18)     |
| O(2)  | 0.69274(7)  | 0.27124(9)   | 1.12852(6)  | 0.03243(17)     |

**Table 3.** Bond lengths [ $\text{\AA}$ ] and angles [ $^\circ$ ] for **25**.

|                 |            |                 |            |
|-----------------|------------|-----------------|------------|
| O(1)–C(1)       | 1.4326(10) | C(1)–C(8)       | 1.5361(11) |
| C(1)–C(2)       | 1.5513(11) | C(1)–C(5)       | 1.5623(11) |
| C(2)–C(3)       | 1.5124(13) | C(2)–C(7)       | 1.5609(13) |
| C(3)–C(4)       | 1.3369(14) | C(4)–C(5)       | 1.5137(12) |
| C(5)–C(6)       | 1.5644(11) | C(6)–C(11)      | 1.5168(11) |
| C(6)–C(7)       | 1.5581(12) | C(8)–C(9)       | 1.4990(13) |
| C(9)–C(10)      | 1.3139(14) | C(11)–O(2)      | 1.4314(10) |
| O(1)–C(1)–C(8)  | 109.22(6)  | O(1)–C(1)–C(2)  | 109.62(6)  |
| C(8)–C(1)–C(2)  | 116.91(7)  | O(1)–C(1)–C(5)  | 112.96(6)  |
| C(8)–C(1)–C(5)  | 114.44(6)  | C(2)–C(1)–C(5)  | 92.96(6)   |
| C(3)–C(2)–C(1)  | 100.01(7)  | C(3)–C(2)–C(7)  | 105.32(7)  |
| C(1)–C(2)–C(7)  | 101.07(7)  | C(4)–C(3)–C(2)  | 107.91(8)  |
| C(3)–C(4)–C(5)  | 107.52(8)  | C(4)–C(5)–C(1)  | 99.98(7)   |
| C(4)–C(5)–C(6)  | 106.69(7)  | C(1)–C(5)–C(6)  | 100.39(6)  |
| C(11)–C(6)–C(7) | 113.19(7)  | C(11)–C(6)–C(5) | 114.22(7)  |
| C(7)–C(6)–C(5)  | 102.49(6)  | C(6)–C(7)–C(2)  | 103.37(6)  |
| C(9)–C(8)–C(1)  | 113.13(7)  | C(10)–C(9)–C(8) | 125.08(9)  |
| O(2)–C(11)–C(6) | 108.90(7)  |                 |            |

**Table 4.** Hydrogen coordinates and isotropic displacement parameters ( $\text{\AA}^2$ ) for **25**.

|        | x      | y       | z      | U     |
|--------|--------|---------|--------|-------|
| H(1)   | 0.3576 | -0.0546 | 0.8175 | 0.034 |
| H(2A)  | 0.4682 | 0.2167  | 0.6341 | 0.032 |
| H(3)   | 0.7026 | 0.2277  | 0.6915 | 0.041 |
| H(4)   | 0.7915 | 0.0938  | 0.8869 | 0.036 |
| H(5)   | 0.6169 | -0.0114 | 0.9612 | 0.027 |
| H(6)   | 0.4835 | 0.2333  | 0.9643 | 0.028 |
| H(7A)  | 0.5464 | 0.4467  | 0.8020 | 0.034 |
| H(7B)  | 0.4112 | 0.3692  | 0.7902 | 0.034 |
| H(8A)  | 0.5981 | -0.1374 | 0.7156 | 0.034 |
| H(8B)  | 0.5055 | -0.2289 | 0.7751 | 0.034 |
| H(9)   | 0.4232 | -0.0807 | 0.5420 | 0.035 |
| H(10A) | 0.3334 | -0.3632 | 0.6324 | 0.054 |
| H(10B) | 0.2831 | -0.2897 | 0.4959 | 0.054 |
| H(11A) | 0.7229 | 0.3785  | 0.9866 | 0.032 |
| H(11B) | 0.6177 | 0.4729  | 1.0288 | 0.032 |
| H(2)   | 0.7446 | 0.3316  | 1.1785 | 0.049 |

**Table 5.** Torsion angles [ $^\circ$ ] for **25**.

|                      |             |                      |            |
|----------------------|-------------|----------------------|------------|
| O(1)–C(1)–C(2)–C(3)  | 166.31(7)   | C(8)–C(1)–C(2)–C(3)  | -68.74(8)  |
| C(5)–C(1)–C(2)–C(3)  | 50.65(7)    | O(1)–C(1)–C(2)–C(7)  | 58.38(8)   |
| C(8)–C(1)–C(2)–C(7)  | -176.68(7)  | C(5)–C(1)–C(2)–C(7)  | -57.28(7)  |
| C(1)–C(2)–C(3)–C(4)  | -34.29(10)  | C(7)–C(2)–C(3)–C(4)  | 70.22(10)  |
| C(2)–C(3)–C(4)–C(5)  | 0.22(11)    | C(3)–C(4)–C(5)–C(1)  | 33.65(9)   |
| C(3)–C(4)–C(5)–C(6)  | -70.48(9)   | O(1)–C(1)–C(5)–C(4)  | -163.36(7) |
| C(8)–C(1)–C(5)–C(4)  | 70.83(8)    | C(2)–C(1)–C(5)–C(4)  | -50.59(7)  |
| O(1)–C(1)–C(5)–C(6)  | -54.17(8)   | C(8)–C(1)–C(5)–C(6)  | -179.98(7) |
| C(2)–C(1)–C(5)–C(6)  | 58.60(7)    | C(4)–C(5)–C(6)–C(11) | -57.29(9)  |
| C(1)–C(5)–C(6)–C(11) | -161.12(7)  | C(4)–C(5)–C(6)–C(7)  | 65.52(8)   |
| C(1)–C(5)–C(6)–C(7)  | -38.30(8)   | C(11)–C(6)–C(7)–C(2) | 125.54(8)  |
| C(5)–C(6)–C(7)–C(2)  | 2.03(8)     | C(3)–C(2)–C(7)–C(6)  | -68.48(8)  |
| C(1)–C(2)–C(7)–C(6)  | 35.25(8)    | O(1)–C(1)–C(8)–C(9)  | 59.95(9)   |
| C(2)–C(1)–C(8)–C(9)  | -65.20(10)  | C(5)–C(1)–C(8)–C(9)  | -172.31(7) |
| C(1)–C(8)–C(9)–C(10) | -116.93(12) | C(7)–C(6)–C(11)–O(2) | 178.91(7)  |
| C(5)–C(6)–C(11)–O(2) | -64.30(10)  |                      |            |

**Table 6.** Hydrogen bonds for **25** [ $\text{\AA}$  and  $^\circ$ ].

| D–H...A            | d(D–H) | d(H...A) | d(D...A)  | $\angle(\text{DHA})$ |
|--------------------|--------|----------|-----------|----------------------|
| O(1)–H(1)...O(2')  | 0.84   | 1.96     | 2.7953(9) | 176.0                |
| O(2)–H(2)...O(1'') | 0.84   | 1.94     | 2.7831(9) | 175.7                |

Symmetry operations for equivalent atoms

'  $-x+1, -y, -z+2$  "  $x+1/2, -y+1/2, z+1/2$
